# Supplementary material
Source: PubMed Central journal article supplement (PMC2785226)
Supplement: NIHMS144572-supplement-1_si_001.pdf [file NIHMS144572-supplement-1_si_001.pdf]

## Supporting Information

# Asymmetric Synthesis of Functionalized Cyclopentanones via a Multicatalytic Secondary Amine/*N*-Heterocyclic Carbene Cascade Sequence

Stephen P. Lathrop and Tomislav Rovis\*

*Department of Chemistry, Colorado State University  
Fort Collins, Colorado 80523*

### Table of Contents:

|                                                                                |         |
|--------------------------------------------------------------------------------|---------|
| Materials and Methods. . . . .                                                 | S2      |
| General Procedures. . . . .                                                    | S3-S5   |
| Characterization Data for Products . . . . .                                   | S6-S22  |
| References. . . . .                                                            | S23     |
| <sup>1</sup> H and <sup>13</sup> C Spectra for Products . . . . .              | S24-S41 |
| nOe for <b>10a</b> and <b>10f</b> . . . . .                                    | S42     |
| Determination of Absolute Configuration . . . . .                              | S43     |
| Evidence for retro-Michael in the absence of azolium . . . . .                 | S43     |
| X-ray Crystal Structure and Data for <b>13</b> (major diastereomer). . . . .   | S45-S55 |
| X-ray Crystal Structure and Data for <b>10d</b> (minor diastereomer) . . . . . | S56-S62 |

## Materials and Methods

All reactions were carried out under an atmosphere of argon with magnetic stirring. HPLC grade Chloroform preserved with pentane was purchased from Fisher Scientific. Column chromatography was performed on SiliCycle®SilicaFlash® P60, 40-63µm 60A. Thin layer chromatography was performed on SiliCycle® 250µm 60A plates. Visualization was accomplished with UV light or cerium ammonium molybdenate stain followed by heating.

<sup>1</sup>H NMR spectra were recorded on Varian 300 or 400 MHz spectrometers at ambient temperature unless otherwise stated. Data is reported as follows: chemical shift in parts per million (δ, ppm) from CDCl<sub>3</sub> (7.26 ppm), toluene-d<sub>8</sub> (7.09, 7.0, 6.98, 2.09 ppm) or benzene-d<sub>6</sub> (7.16 ppm) multiplicity (s = singlet, bs = broad singlet, d = doublet, t = triplet, q = quartet, and m = multiplet), coupling constants (Hz). <sup>13</sup>C NMR was recorded on Varian 300 or 400 MHz spectrometers (at 75 or 100 MHz) at ambient temperature. Chemical shifts are reported in ppm from CDCl<sub>3</sub> (77.2 ppm) or toluene-d<sub>8</sub> (137.86 (1), 129.4 (3), 128.33 (3), 125.49 (3), 20.4 (5) ppm).

$\alpha,\beta$ -Aldehydes and 1,3 dicarbonyls were either purchased from Aldrich or Acros or prepared via literature procedures (**4d**<sup>1</sup>, **4e**<sup>2</sup>, **4f**<sup>3</sup>, **4g**<sup>4</sup>, **4h**<sup>5</sup>, **8c**<sup>6</sup>).  $\beta$ -ketoester **8g** was purchased from Aldrich as the HCl salt. The free base was generated by stirring in saturated NaHCO<sub>3</sub> and extraction with ethyl acetate. 3,5-bis(trifluoromethyl) diphenyl prolinol TMS **5** ether catalyst was prepared according to literature procedure.<sup>7</sup> Pentafluorophenyl triazolium catalyst **6** was prepared according to literature procedure.<sup>8</sup>

## General Procedures

### General Procedure for Multicatalytic Cascade Michael/Benzoin Reaction:

A 1 dram vial was equipped with a magnetic stir bar under argon and charged with 8.0 mg (0.022 mmol) of triazolium salt **6**.  $\text{CHCl}_3$  (1 ml), 1,3 dicarbonyl (0.448 mmol), and enal (0.224 mmol) were added sequentially followed by 26.3 mg (0.044 mmol) of siloxy prolinol **5** and 1.8 mg (0.022 mmol) of sodium acetate in one portion. After stirring at ambient temperature for 12 h the reaction was filtered through a 1in plug of silica, eluted with  $\text{Et}_2\text{O}$  (~10 ml) and concentrated *in vacuo*. The resulting crude product was purified by flash silica gel chromatography.

### Procedure for preparation of **10a** on 2.4 mmol Scale

A 10 ml round bottom flask was equipped with a magnetic stir bar under argon and charged with 44.0 mg (0.12 mmol) of triazolium salt **6**.  $\text{CHCl}_3$  (5 ml), methyl acetoacetate 520  $\mu\text{l}$  (4.82 mmol), and crotonaldehyde 200  $\mu\text{l}$  (2.41 mmol) were added sequentially followed by 144 mg (0.241 mmol) of siloxy prolinol **5** and 10.0 mg (0.12 mmol) of sodium acetate in one portion. After stirring at ambient temperature for 12 h the reaction was pre-absorbed on silica gel and purified by flash silica gel chromatography (4:1 hexanes/ $\text{EtOAc}$ ,  $R_f = 0.3$  2:1 hexanes/ $\text{EtOAc}$ ). 404 mg of the desired product **10a** was isolated as a separable mixture of diastereomers (90% yield). 64:33:3:<1 dr, 91% ee (major diastereomer).

**Procedure for Preparation of Aldehyde 11:**

A 1 dram vial was equipped with a magnetic stir bar and placed under an argon atmosphere.  $\text{CHCl}_3$  (1 ml), acetylacetone 48  $\mu\text{l}$  (0.448 mmol), and crotonaldehyde 19  $\mu\text{l}$  (0.224 mmol) were added sequentially followed by 26.3 mg (0.044 mmol) of siloxy prolinol **5**. After stirring at ambient temperature for 12 h the reaction was filtered through a 1 in plug of silica, eluted with  $\text{Et}_2\text{O}$  (~10 ml) and concentrated *in vacuo*. The resulting crude product was submitted to flash silica gel chromatography (2:1 hexanes/ $\text{EtOAc}$ ,  $R_f = 0.2$ , 2:1 hexanes/ $\text{EtOAc}$ ) to afford 27 mg of semi-pure material (~80% pure) in 70% yield. For complete characterization and determination of ee the resultant aldehyde **11** was converted to the  $\alpha,\beta$ -unsaturated ethyl ester via wittig reaction (*vide infra*).

**Procedure for Preparation of  $\alpha,\beta$ -unsaturated Ethyl Ester 11b.**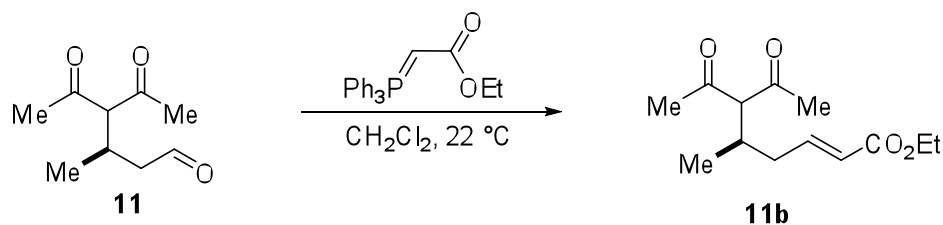

Aldehyde **11**, 20 mg (0.118 mmol) was dissolved in  $\text{CH}_2\text{Cl}_2$  (1 ml) and added to a 1 dram vial equipped with magnetic stir bar. (Carbethoxymethylene)-triphenylphosphorane 41 mg (0.118 mmol) was added and the reaction was allowed to stir at ambient temperature. After stirring for 30 minutes the reaction was filtered through a 1 in plug of silica, eluted with  $\text{Et}_2\text{O}$  (~10 ml) and concentrated *in vacuo*. The resulting crude product was purified by flash silica gel chromatography (4:1 hexanes/ $\text{EtOAc}$ ,  $R_f = 0.4$ , 2:1 hexanes/ $\text{EtOAc}$ ). 21 mg of desired product **11b** was isolated as a separable mixture of olefin isomers (75% yield) 5:1 *E/Z*, 60% ee (*E*

isomer). Chiracel A-DH column 97:3 hexanes/*iso*-propanol, 1.0 ml/min, peaks appear at 11.85 (minor) and 13.00 (major).

### Procedure for Preparation of Cyclopentanone **7** from Aldehyde **11**

A 1 dram vial was equipped with a magnetic stir bar under argon and charged with 4.3 mg (0.012 mmol) of triazolium salt **6**. CHCl<sub>3</sub> (1 ml), aldehyde **11** 20mg (0.118 mmol), were added sequentially followed by sodium acetate 1 mg (0.012 mmol). After stirring at ambient temperature for 12 h the reaction was filtered through a 1in plug of silica, eluted with Et<sub>2</sub>O (~10 ml) and concentrated *in vacuo*. The resulting crude product was purified by flash silica gel chromatography (2:1 hexanes/EtOAc, R<sub>f</sub> = 0.3 2:1 hexanes/EtOAc). 13 mg of the desired product **7** was isolated as an inseparable mixture of diastereomers (65% yield). 85:15 :<1:<1 dr, 58% ee (major diastereomer). Chiraldex BDM-2 column at 140 °C at 1 mL/min; peaks appear at 8.55 minutes (major) and 8.88 minutes (minor).

### Characterization Data for Cyclopentanone Products

**Compound 7a:** (2*R*,3*S*,4*R*)-3-acetyl-2-hydroxy-2,4-dimethylcyclopentanone

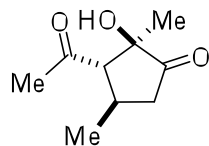

**Major Diastereomer**

**Yield:** 35mg, 93%, 86% ee (Major) 85:15:<1:<1 dr (Isolated as an inseparable mixture of two diastereomers)

**Physical State:** white solid, mp = 58-61 °C (from CH<sub>2</sub>Cl<sub>2</sub>)

**R<sub>f</sub>:** 0.3 (2:1 hex/EtOAc), Purified 2:1 hexanes/EtOAc

**[α]<sub>D</sub><sup>21</sup>** = -32.8 (c = 0.010 g/ml, CH<sub>2</sub>Cl<sub>2</sub>)

**GC Analysis:** Chiraldex BDM-2 column at 140 °C at 1 mL/min; peaks appear at 8.55 minutes (major) and 8.88 minutes (minor).

**IR:** (NaCl, neat) 3447 (br), 2966, 2925, 2873, 1767, 1711, 1362, 1271, 1168, 1132 cm<sup>-1</sup>

**<sup>1</sup>H NMR:** (400 MHz, CDCl<sub>3</sub>) δ 2.95 (bs, 1H), 2.75 (d, *J* = 11.0 Hz, 1H), 2.66 (dd, *J* = 19.4, 9.2, 1H), 2.55 (m, 1H), 2.26 (s, 1H), 1.90 (dd, *J* = 19.6, 10.0, 1H) 1.03 (d, *J* = 6.2, 3H), 1.01 (s, 3H)

**<sup>13</sup>C NMR:** (100 MHz, CDCl<sub>3</sub>): δ 217.8, 207.4, 80.2, 66.0, 41.3, 32.0, 26.5, 20.3, 19.8

**HRMS:** (ESI-) calculated for C<sub>9</sub>H<sub>14</sub>O<sub>3</sub>, 170.0943. Found 170.0941.

**Compound 7b:** (2*R*,3*S*,4*R*)-3-acetyl-2-hydroxy-2-methyl-4-propylcyclopentanone

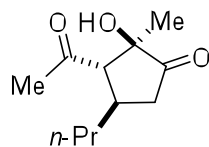

**Major Diastereomer**

**Yield:** 34.0 mg, 77%, 93% ee (Major) 85:15:<1:<1 dr (Isolated as an inseparable mixture of two diastereomers)

**Physical State:** colorless oil

**R<sub>f</sub>:** 0.4 (2:1 hex/EtOAc), Purified 3:1 hex/EtOAc

**[α]<sub>D</sub><sup>21</sup>** = -42.2 (c = 0.010 g/ml, CH<sub>2</sub>Cl<sub>2</sub>)

**GC Analysis:** Chiraldex BDM-2 column at 140 °C at 1 mL/min; peaks appear at 17.07 minutes (major) and 17.96 minutes (minor).

**IR:** (NaCl, neat) 3457 (br), 2960, 2919, 2863, 1757, 1706, 1373, 1275, 1183, 1137 cm<sup>-1</sup>

**<sup>1</sup>H NMR:** (400 MHz, CDCl<sub>3</sub>) δ 2.97 (bs, 1H), 2.83 (d, *J* = 11.0 Hz, 1H), 2.69 (dd, *J* = 9.5, 19.4 Hz, 1H), 2.55 (m, 1H), 2.29 (s, 1H), 1.93 (dd, *J* = 9.7, 19.6 Hz, 1H), 1.48 (m, 1H), 1.28 (m, 2H), 1.13 (m, 1H), 1.04 (s, 3H) 0.89 (t, *J* = 7.0 Hz, 3H)

**<sup>13</sup>C NMR:** (100 MHz, CDCl<sub>3</sub>): δ 217.7, 207.5, 80.0, 64.6, 39.4, 37.8, 32.1, 31.4, 21.3, 20.5, 14.3

**HRMS:** (ESI+) Calculated for C<sub>11</sub>H<sub>18</sub>O<sub>3</sub>, 198.1256. Found 198.1258.

**Compound 7c:** (2*R*,3*S*,4*R*)-3-acetyl-2-hydroxy-2-methyl-4-phenylcyclopentanone

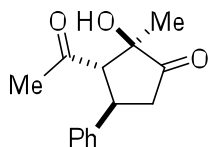

**Major Diastereomer**

**Yield:** 31.0 mg, 60%, 85% ee (Major) 80:20:<1:<1 dr (Isolated as an inseparable mixture of two diastereomers)

**Physical State:** off white solid, mp = 90-92 °C (from CH<sub>2</sub>Cl<sub>2</sub>)

**R<sub>f</sub>:** 0.37 (2:1 hex/EtOAc), Purified 3:1 hex/EtOAc

**[α]<sub>D</sub><sup>21</sup>** = +4.5 (c = 0.010 g/ml, CH<sub>2</sub>Cl<sub>2</sub>)

**GC Analysis:** Chiraldex BDM-1 column at 170 °C at 2 mL/min; peaks appear at 14.47 minutes (major) and 14.95 minutes (minor).

**IR:** (NaCl, neat) 3226 (br), 3021, 2914, 2848, 1751, 1711, 1367, 1270, 1168 cm<sup>-1</sup>

**<sup>1</sup>H NMR:** (400 MHz, CDCl<sub>3</sub>) δ 7.28 (m, 5H), 3.75 (ddd, *J* = 20.0, 11.5, 9.3 Hz, 1H), 3.38 (d, *J* = 11.5 Hz, 1H), 2.98 (dd, *J* = 20.1, 9.5 Hz, 1H), 2.48 (dd, *J* = 20.1, 10.6 Hz, 1H), 2.20 (s, 3H), 1.17 (s, 3H)

**<sup>13</sup>C NMR:** (100 MHz, CDCl<sub>3</sub>): δ 216.6, 206.3, 141.6, 129.0, 127.6, 127.3, 80.3, 65.6, 41.6, 37.2, 32.0, 20.5

**HRMS:** (ESI+) Calculated for C<sub>14</sub>H<sub>16</sub>O<sub>3</sub>, 232.1099. Found 232.11.

**Compound 7d:** (2*R*,3*S*,4*R*)-3-acetyl-4-(4-bromophenyl)-2-hydroxy-2-methylcyclopentanone

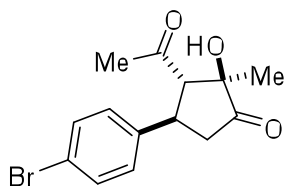

### Major Diastereomer

**Yield:** 49.0 mg, 70%, 80% ee (Major) 85:15:<1:<1 (Isolated as an inseparable mixture of two diastereomers)

**Physical State:** white solid, mp = 128-130 °C (from CH<sub>2</sub>Cl<sub>2</sub>)

**R<sub>f</sub>:** 0.3 (2:1 hex/EtOAc), Purified 3:1 hex/EtOAc

**[α]<sub>D</sub><sup>21</sup>** = -5.9 (c = 0.010 g/ml, CH<sub>2</sub>Cl<sub>2</sub>)

**HPLC Analysis:** Chiracel O-DH column 90:10 hexanes/*iso*-propanol, 1.0 mL/min; peaks appear at 10.25 minutes (minor) and 15.98 minutes (major).

**IR:** (NaCl, neat) 3442 (br), 2960, 2924, 2863, 1751, 1701, 1491, 1368, 1178, 1137 cm<sup>-1</sup>

**<sup>1</sup>H NMR:** (400 MHz, CDCl<sub>3</sub>) δ 7.36 (d, *J* = 8.5 Hz, 2H), 7.06 (d, *J* = 8.5 Hz, 2H) 3.64 (ddd, *J* = 10.4, 10.4, 10.4 Hz, 1H), 3.23 (d, *J* = 11.7 Hz, 1H), 2.88 (dd, *J* = 20.0, 9.6 Hz, 1H) 2.35 (dd, *J* = 20.2, 10.6 Hz, 1H) 2.12 (s, 3H), 1.07 (s, 3H)



**<sup>13</sup>C NMR:** (100 MHz, CDCl<sub>3</sub>): δ 216.1, 206.0, 140.7, 132.2, 129.4, 121.2, 80.2, 65.7, 41.4, 36.7, 31.9, 20.5

**HRMS:** (ESI-) Calculated for C<sub>14</sub>H<sub>15</sub>BrO<sub>3</sub>, 370.0416. Found 370.0423.

**Compound 7e:** (2*R*,3*S*,4*R*)-3-acetyl-2-hydroxy-2-methyl-4-phenethylcyclopentanone

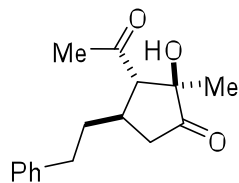

**Major Diastereomer**

**Yield:** 34.0 mg, 59%, 95% ee 80:20:<1:<1 dr (Major) (Isolated as an inseparable mixture of two diastereomers)

**Physical State:** colorless oil

**R<sub>f</sub>:** 0.3 (2:1 hex/EtOAc), Purified 4:1 hex/EtOAc

**[α]<sub>D</sub><sup>21</sup>** = -14.2 (c = 0.010 g/ml, CH<sub>2</sub>Cl<sub>2</sub>)

**GC Analysis:** Chiraldex BDM-1 column at 170 °C at 2 mL/min; peaks appear at 34.26 minutes (major) and 36.08 minutes (minor).

**IR:** (NaCl, neat) 3431 (br), 3057, 3016, 2929, 2853, 1757, 1706, 1460, 1362 cm<sup>-1</sup>

**<sup>1</sup>H NMR:** (400 MHz, CDCl<sub>3</sub>) δ 7.20 (m, 5H), 2.84 (d, *J* = 11.0 Hz, 1H), 2.69 (dd, *J* = 19.4, 9.2 Hz, 1H), 2.59 (m, 3H), 2.26 (s, 3H), 1.97 (dd, *J* = 19.6, 9.6 Hz, 1H), 1.88, (1H, m), 1.43 (1H, m)

**<sup>13</sup>C NMR:** (100 MHz, CDCl<sub>3</sub>): δ 217.1, 207.2, 141.5, 128.7, 128.4, 126.3, 79.8, 64.5, 39.3, 37.1, 34.4, 31.9, 31.4, 20.4

**HRMS:** (ESI-) Calculated for C<sub>16</sub>H<sub>20</sub>O<sub>3</sub>, 260.14124. Found 260.14119.

**Compound 7f:** (2*R*,3*S*,4*R*)-3-acetyl-2-hydroxy-2-methyl-4-((triisopropylsilyloxy)-methyl)cyclopentanone

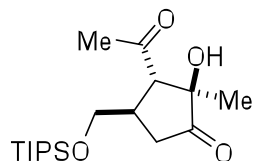

### Major Diastereomer

**Yield:** 48.0 mg, 63%, 92% ee 75:25:<1:<1 dr (Major) (Isolated as an inseparable mixture of two diastereomers)

**Physical State:** colorless oil

**R<sub>f</sub>:** 0.4 (3:1 hex/EtOAc), Purified 6:1 hex/EtOAc

**[α]<sub>D</sub><sup>21</sup>** = -8.2 (c = 0.010 g/ml, CH<sub>2</sub>Cl<sub>2</sub>)

**HPLC Analysis:** Chiracel O-DH column 98:2 hexanes/*iso*-propanol, 1.0 mL/min; peaks appear at 7.94 minutes (minor) and 9.90 minutes (major).

**IR:** (NaCl, neat) 3421 (br), 2934, 2920, 2863, 1757, 1711, 1450, 1383, 1122, 1096 cm<sup>-1</sup>

**<sup>1</sup>H NMR:** (400 MHz, CDCl<sub>3</sub>) δ 3.66 (ddd, *J* = 17.0, 10.2, 3.8 Hz, 2H), 3.17 (d, *J* = 10.7 Hz, 1H), 2.7 (m, 1H), 2.52 (dd, *J* = 19.6, 9.2 Hz, 1H), 2.38 (dd, *J* = 19.8, 9.8 Hz, 1H), 2.27 (s, 3H), 1.05 (s, 1H), 1.0 (m, 21H)

**<sup>13</sup>C NMR:** (100 MHz, CDCl<sub>3</sub>): δ 217.2, 207.5, 80.1, 63.1, 59.5, 35.3, 33.9, 31.6, 20.5, 18.1, 12.0

**HRMS:** (ESI+) Calculated for C<sub>18</sub>H<sub>34</sub>O<sub>4</sub>Si, 342.2229. Found 342.2227.

**Compound 7g:** ((1*R*,2*S*,3*R*)-2-acetyl-3-hydroxy-3-methyl-4-oxocyclopentyl)methyl benzoate

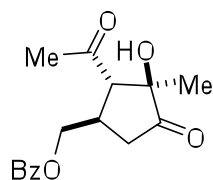

### Major Diastereomer

**Yield:** 47.0 mg, 72%, 95% ee (Major) 80:20:<1:<1 (Isolated as an inseparable mixture of two diastereomers)

**Physical State:** off white solid mp = 119-121 °C (from CH<sub>2</sub>Cl<sub>2</sub>)

**R<sub>f</sub>:** 0.2 (2:1 hex/EtOAc), Purified 2:1 hex/EtOAc

**[α]<sub>D</sub><sup>21</sup>** = -9.2 (c = 0.010 g/ml, CH<sub>2</sub>Cl<sub>2</sub>)

**HPLC Analysis:** Chiracel O-DH column 90:10 hexanes/*iso*-propanol, 1.0 mL/min; peaks appear at 14.39 minutes (minor) and 15.82 minutes (major).

**IR:** (NaCl, neat) 3457 (br), 3058, 2955, 2924, 2899, 1752, 1701, 1372, 1291, 1127 cm<sup>-1</sup>

**<sup>1</sup>H NMR:** (400 MHz, CDCl<sub>3</sub>) δ 7.95 (d, *J* = 7.7 Hz, 1H), 7.55 (t, *J* = 7.5 Hz, 1H), 7.42 (t, *J* = 8.1 Hz, 1H), 4.35 (dd, *J* = 11.1, 4.7 Hz, 1H), 4.25 (dd, *J* = 11.1, 4.5 Hz, 1H) 3.06 (m, 1H), 3.05 (d, *J* = 6.6 Hz, 1H), 2.72 (dd, *J* = 19.8, 8.5 Hz, 1H), 2.29 (s, 3H), 2.27 (dd, *J* = 19.8, 8.0 Hz, 1H), 1.08 (s, 3H)

**<sup>13</sup>C NMR:** (100 MHz, CDCl<sub>3</sub>): δ 215.9, 206.5, 166.6, 133.5, 129.8, 128.7, 79.9, 65.6, 60.5, 35.9, 31.1, 20.4

**HRMS:** (ESI+) Calculated for C<sub>16</sub>H<sub>18</sub>O<sub>5</sub>, 290.1154. Found 290.1157.

**Compound 7h:** *tert*-butyl 2-((1*R*,2*S*,3*R*)-2-acetyl-3-hydroxy-3-methyl-4-oxocyclopentyl)ethyl(benzyl)carbamate

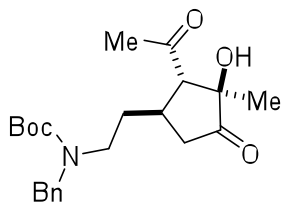

### Major Diastereomer

**Yield:** 52.0 mg, 60%, 90% ee (Major) 85:15:<1:<1 (Isolated as an inseparable mixture of two diastereomers)

**Physical State:** yellow oil

**R<sub>f</sub>:** 0.2 (2:1 hex/EtOAc), Purified 2:1 hex/EtOAc

**[α]<sub>D</sub><sup>21</sup>** = -26.7 (c = 0.010 g/ml, CH<sub>2</sub>Cl<sub>2</sub>)

**HPLC Analysis:** Chiracel OD-H column 95:5 hexanes/*iso*-propanol, 1.0 mL/min; peaks appear at 14.96 minutes (minor) and 19.80 minutes (major).

**IR:** (NaCl, neat) 3441 (br), 2960, 2924, 2863, 1751, 1701, 1491, 1367, 1280, 1178 cm<sup>-1</sup>

**<sup>1</sup>H NMR:** (300 MHz, 95 °C, toluene-*d*<sub>8</sub>) δ 7.10 (m, 5H), 4.30 (q, *J* = 23.8, 15.5 Hz, 2H) 3.03 (m, 2H) 2.43 (d, *J* = 10.6 Hz, 1H) 2.29 (dd, *J* = 18.5, 9.2, 1H) 2.28 (m, 1H) 2.0 (s, 3H) 1.59 (dd, *J* = 19.0, 9.0 Hz, 1H) 1.58 (m, 1H) 1.40 (s, 9H), 1.08 (m, 1H) 0.77 (s, 3H)

**<sup>13</sup>C NMR:** (75 MHz, 95 °C, toluene-*d*<sub>8</sub>): δ 214.8 204.8, 155.4, 139.0, 128.3, 128.4, 127.1, 79.2, 79.1, 64.3, 50.6, 45.1, 38.8, 33.5, 30.6, 29.2, 28.2, 22.9

**HRMS:** (ESI+) Calculated for C<sub>22</sub>H<sub>31</sub>NO<sub>5</sub>, 389.2202. Found 389.2208.

**Compound 7i:** (2*R*,3*S*,4*S*)-3-acetyl-2-hydroxy-4-isopropyl-2-methylcyclopentanone

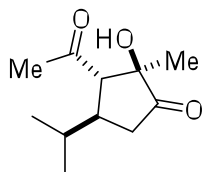

**Major Diastereomer**

**Yield:** 14.0 mg, 32%, 82% ee (Major) 67:33:<1:<1 dr (Isolated as an inseparable mixture of two diastereomers)

**Physical State:** colorless oil

**R<sub>f</sub>:** 0.35 (2:1 hex/EtOAc), Purified 3:1 hex/EtOAc.

**[ $\alpha$ ]<sub>D</sub><sup>21</sup>** = -22.8 (c = 0.010 g/ml, CH<sub>2</sub>Cl<sub>2</sub>)

**GC Analysis:** Chiraldex BDM-2 column at 140 °C at 1 mL/min; peaks appear at 15.36 minutes (major) and 15.93 minutes (minor).

**IR:** (NaCl, neat) 3442 (br), 2966, 2925, 2873, 1757, 1706, 1372, 1280, 1250, 1193 cm<sup>-1</sup>

**<sup>1</sup>H NMR:** (400 MHz, CDCl<sub>3</sub>)  $\delta$  2.93 (d, *J* = 11.1 Hz, 1H), 2.57 (dd, *J* = 19.6, 9.8 Hz, 1H), 2.47 (m, 1H), 2.27 (s, 3H), 2.00 (dd, *J* = 19.6, 9.2 Hz, 1H), 1.55 (m, 1H), 1.01 (s, 3H), 0.82 (d, *J* = 6.8 Hz, 3H), 0.80 (d, *J* = 6.8 Hz, 3H)

**<sup>13</sup>C NMR:** (100 MHz, CDCl<sub>3</sub>):  $\delta$  217.5, 207.7, 80.5, 62.0, 38.1, 36.3, 32.0, 23.6, 21.6, 20.8, 19.0

**HRMS:** (ESI+) Calculated for C<sub>11</sub>H<sub>18</sub>O<sub>3</sub>, 198.1256. Found 198.1259.

**Compound 10a:** (1*S*,2*R*,5*R*)-methyl 2-hydroxy-2,5-dimethyl-3-oxocyclopentane-carboxylate

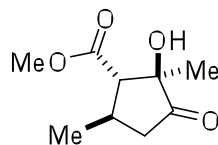

**Major Diastereomer**

**Yield:** 38.0 mg, 90% yield, 91% ee (Major) 64:33:3:<1 dr (Major diastereomer is separable from other diastereomers).

**Physical State:** white solid, mp = 79-81 °C (from CH<sub>2</sub>Cl<sub>2</sub>)

**R<sub>f</sub>:** 0.3 (2:1 hex/EtOAc), Purified 4:1 hex/EtOAc

**[α]<sub>D</sub><sup>21</sup>** = -51.1 (c = 0.010 g/ml, CH<sub>2</sub>Cl<sub>2</sub>)

**GC Analysis:** Chiraldex BDM-2 column at 140 °C at 2 mL/min; peaks appear at 21.55 minutes (major) and 22.48 minutes (minor).

**IR:** (NaCl, neat) 3431 (br), 2971, 2909, 1746, 1716, 1440, 1363, 1244, 1209, 1163 cm<sup>-1</sup>

**<sup>1</sup>H NMR:** (400 MHz, benzene-d<sub>6</sub>) δ 3.21 (s, 3H), 2.59 (bs, 1H), 2.36 (d, *J* = 11.1 Hz, 1H), 2.03 (m, 1H) 1.91 (dd, *J* = 19.8, 8.7 Hz, 1H), 1.25 (dd, *J* = 19.2, 10.4 Hz, 1H), 0.92 (s, 1H) 0.61 (d, *J* = 6.4 Hz, 3H).

**<sup>13</sup>C NMR:** (75 MHz, CDCl<sub>3</sub>): δ 216.8, 172.0, 80.1, 59.4, 52.3, 41.6, 28.4, 20.6, 19.7.

**HRMS:** (ESI-) Calculated for C<sub>9</sub>H<sub>14</sub>O<sub>4</sub>, 186.0892. Found 186.0892.

**Compound 10b:** (1*S*,2*R*,5*R*)-ethyl 2-hydroxy-2-methyl-3-oxo-5-propylcyclopentane-carboxylate

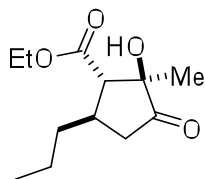

**Major Diastereomer**

**Yield:** 41.0 mg, 80%, 93% ee (Major) 60:30:8:2 dr (Major diastereomer is separable from other diastereomers)

**Physical State:** colorless oil

**R<sub>f</sub>:** 0.3 (2:1 hex/EtOAc) Purified 4:1 hex/EtOAc.

**[α]<sub>D</sub><sup>21</sup>** = -55.2 (c = 0.010 g/ml, CH<sub>2</sub>Cl<sub>2</sub>)

**GC Analysis:** Chiraldex BDM-2 column at 140 °C at 2 mL/min; peaks appear at 21.55 minutes (major) and 22.48 minutes (minor).

**IR:** (NaCl, neat) 3421 (br), 2955, 2934, 2873, 1751, 1726, 1654, 1383, 1270, 1188 cm<sup>-1</sup>

**<sup>1</sup>H NMR:** (400 MHz, CDCl<sub>3</sub>) δ 4.23 (q, *J* = 14.1, 6.4 Hz, 2H) 2.68 (dd, *J* = 19.6, 8.7 Hz, 1H) 2.64 (d, *J* = 11.5 Hz 1H) 2.43 (m, 1H) 1.94 (dd, *J* = 19.6, 10.0 Hz, 1H) 1.58 (m, 1H) 1.4-1.2 (m, 3H) 1.29 (t, *J* = 7.0 Hz, 3H) 1.16 (s, 3H) 0.90 (t, *J* = 7.2 Hz, 3)

**<sup>13</sup>C NMR:** (100 MHz, CDCl<sub>3</sub>): δ 216.7, 171.6, 79.9, 61.2, 58.1, 39.6, 37.6, 33.1, 21.0, 20.7, 14.6, 14.2

**HRMS:** (ESI+) Calculated for C<sub>12</sub>H<sub>20</sub>O<sub>4</sub>, 228.1362. Found 228.1358.

**Compound 10c:** (1*S*,2*R*,5*R*)-tert-butyl 2-hydroxy-2-methyl-3-oxo-5-phenylcyclopentanecarboxylate

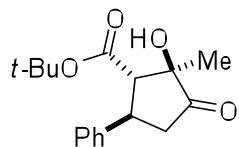

### Major Diastereomer

**Yield:** 56.0 mg, 86%, 97% ee (Major) 60:35:5:<1 dr (Major diastereomer is separable from other diastereomers).

**Physical State:** white solid, mp = 103-105 °C (from CH<sub>2</sub>Cl<sub>2</sub>)

**R<sub>f</sub>:** 0.6 (2:1 hex/EtOAc), Purified 5:1 hex/EtOAc

**[α]<sub>D</sub><sup>21</sup>** = -112 (c = 0.010 g/ml, CH<sub>2</sub>Cl<sub>2</sub>)

**GC Analysis:** Chiraldex BDM-1 column at 170 °C at 3 mL/min; peaks appear at 27.62 minutes (major) and 27.62 minutes (minor).

**IR:** (NaCl, neat) 3439 (br), 3059, 3021, 3005, 2980, 2929, 1751, 1726, 1388, 1210 cm<sup>-1</sup>

**<sup>1</sup>H NMR:** (300 MHz, CDCl<sub>3</sub>) δ 7.28 (m, 5H), 3.84 (ddd, *J* = 11.5, 11.5, 8.2 Hz, 1H) 3.76 (s, 1H), 3.01 (dd, *J* = 19.2, 8.4 Hz, 1H), 2.81 (d, *J* = 11.5 Hz, 1H), 2.43 (dd, *J* = 19.2, 11.3 Hz, 1H), 1.43 (s, 3H), 1.31 (s, 9H)

**<sup>13</sup>C NMR:** (100 MHz, CDCl<sub>3</sub>): δ 211.8, 171.6, 140.9, 128.9, 127.5, 127.6, 82.6, 59.2, 43.5, 41.7, 28.2, 21.7

**HRMS:** (ESI+) Calculated for C<sub>17</sub>H<sub>22</sub>O<sub>4</sub>, 290.1518. Found 290.1516.



**Compound 10d:** (1S,2R,5R)-benzyl 2-hydroxy-2,5-dimethyl-3-oxocyclopentane-carboxylate

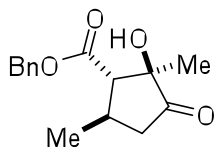

**Major Diastereomer**

**Yield:** 53.0 mg, 90% yield, 82% ee (Major) 58:39:2:<1 dr (Major diastereomer is separable from other diastereomers).

**Physical State:** white solid, mp = 49-51 °C (from CH<sub>2</sub>Cl<sub>2</sub>)

**R<sub>f</sub>:** 0.3 (2:1 hex/EtOAc), Purified 3:1 hex/EtOAc

**[α]<sub>D</sub><sup>21</sup>** = -39.5 (c = 0.010 g/ml, CH<sub>2</sub>Cl<sub>2</sub>)

**GC Analysis:** Chiraldex BDM-2 column at 180 °C at 3 mL/min; peaks appear at 19.50 minutes (minor) and 20.10 minutes (major).

**IR:** (NaCl, neat) 3459 (br), 2961, 2931, 1752, 1731, 1456, 1383, 1190, 1156, 1084 cm<sup>-1</sup>

**<sup>1</sup>H NMR:** (400 MHz, CDCl<sub>3</sub>) δ 7.32 (m, 5H), 5.22 (dd, *J* = 15.6, 12.4 Hz, 2H), 2.67 (dd, *J* = 19.6, 8.7 Hz, 1H) 2.66 (d, *J* = 11.3 Hz, 1H), 2.49 (m, 1H), 1.94 (dd, *J* = 19.6, 10.4 Hz, 1H) 1.14 (d, *J* = 6.4 Hz, 3H), 1.10 (s, 1H).

**<sup>13</sup>C NMR:** (75 MHz, CDCl<sub>3</sub>): δ 216.5, 171.3, 135.9, 128.8, 128.5, 128.4, 80.2, 66.9, 59.5, 41.5, 28.4, 20.5, 19.7.

**HRMS:**

**Compound 10e:** (1*S*,2*R*,5*R*)-tert-butyl 2-hydroxy-2-methyl-3-oxo-5-phenylcyclopentane-carboxylate

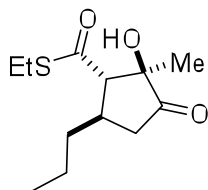

### Major Diastereomer

**Yield:** 31.0 mg, 56%, 81% ee (Major) 69:22:6:3 dr (Major diastereomer is separable from other diastereomers).

**Physical State:** yellow oil

**R<sub>f</sub>:** 0.5 (2:1 hex/EtOAc), Purified 8:1 hex/EtOAc

**[ $\alpha$ ]<sub>D</sub><sup>21</sup>** = -112 (c = 0.010 g/ml, CH<sub>2</sub>Cl<sub>2</sub>)

**GC Analysis:** Chiraldex BDM-2 column at 140 °C at 3 mL/min; peaks appear at 37.19 minutes (major) and 39.13 minutes (minor).

**IR:** (NaCl, neat) 3462(br), 2955, 2928, 2866, 1752, 1679, 1454, 1365, 1128, 1074 cm<sup>-1</sup>

**<sup>1</sup>H NMR:** (300 MHz, CDCl<sub>3</sub>)  $\delta$  2.93 (q, *J* = 7.7 Hz, 2H) 2.87 (d, *J* = 11.1 Hz, 1H) 2.68 (dd, *J* = 19.6, 9.2 Hz, 1H) 2.57 (m, 1H) 1.94 (dd, *J* = 19.6, 10.0 Hz, 1H) 1.52 (m, 1H) 1.28 (m, 3H) 1.27 (t, *J* = 7.5 Hz, 3H) 1.13 (s, 3H) 0.88 (t, *J* = 7.0 Hz, 3H)

**<sup>13</sup>C NMR:** (100 MHz, CDCl<sub>3</sub>):  $\delta$  216.6, 197.9, 80.2, 66.2, 39.7, 37.4, 33.1, 23.9, 21.1, 20.4, 14.8, 14.2

**HRMS:** (ESI+) Calculated for C<sub>12</sub>H<sub>20</sub>O<sub>3</sub>S, 244.1133. Found 244.1136.

**Compound 10f:** (3*R*,3*aR*,6*aR*)-methyl 6*a*-hydroxy-3-methyl-1-oxooctahydropentalene-3*a*-carboxylate

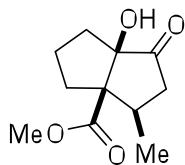

**Major Diastereomer**

**Yield:** 38.0 mg, 79%, 94% ee (Major) 4:1 dr (Major diastereomer is separable from other diastereomers).

**Physical State:** colorless oil

**R<sub>f</sub>:** 0.2 (2:1 hex/EtOAc), Purified 2:1 hex/EtOAc

**[ $\alpha$ ]<sub>D</sub><sup>21</sup>** = -18.4 (c = 0.010 g/ml, CH<sub>2</sub>Cl<sub>2</sub>)

**GC Analysis:** Chiraldex BDM-2 column at 140 °C at 3 mL/min; peaks appear at 12.61 minutes (minor) and 13.11 minutes (major).

**IR:** (NaCl, neat) 3468 (br), 2965, 2873, 1739, 1710, 1448, 1258, 1156, 1042 cm<sup>-1</sup>

**<sup>1</sup>H NMR:** (300 MHz, CDCl<sub>3</sub>)  $\delta$  2.64 (s, 3H) 2.63 (dd, *J* = 18.9, 8.7 Hz, 1H) 2.38 (m, 1H) 2.19 (dd, *J* = 19, 10.9 Hz, 1H) 2.11-1.7 (m, 6H) 1.00 (d, *J* = 5.1 Hz, 3H)

**<sup>13</sup>C NMR:** (100 MHz, CDCl<sub>3</sub>):  $\delta$  216.0, 173.0, 91.3, 67.9, 51.9, 40.9, 36.2, 34.4, 30.8, 22.6, 15.4

**HRMS:** (ESI+) Calculated for C<sub>11</sub>H<sub>16</sub>O<sub>4</sub>, 212.1049. Found 212.1048.

**Compound 10g:** (4a*R*,7*R*,7a*S*)-methyl 2-benzyl-4a-hydroxy-7-methyl-5-oxooctahydro-1*H*-cyclopenta[*c*]pyridine-7a-carboxylate

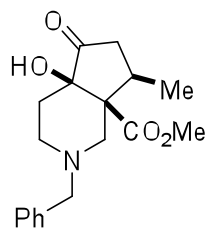

### Major Diastereomer

**Yield:** 54.0 mg, 76%, 90% ee (Major) 5:1 (Major diastereomer is separable from other diastereomers).

**Physical State:** colorless oil

**R<sub>f</sub>:** 0.3 (2:1 hex/EtOAc), Purified 3:1 hex/EtOAc

**[α]<sub>D</sub><sup>21</sup>** = -10.8 (c = 0.010 g/ml, CH<sub>2</sub>Cl<sub>2</sub>)

**HPLC Analysis:** Chiracel O-DH column 95:5 hexanes/*iso*-propanol, 1.0 mL/min; peaks appear at 16.66 minutes (major) and 20.35 minutes (major).

**IR:** (NaCl, neat) 3252 (br), 3021, 2961, 2815, 2768, 1758, 1736, 1451, 1258, 1229 cm<sup>-1</sup>

**<sup>1</sup>H NMR:** (400 MHz, CDCl<sub>3</sub>) δ 7.28 (m, 5H), 3.61 (s, 3H) 3.56 (dd, *J* = 18.1, 13.2 Hz, 2H) 3.07 (ddq, *J* = 7.3, 6.2, 7.0, 10.2, 6.8 Hz, 1H) 2.96 (d, *J* = 12.4 Hz, 1H) 2.69 (ddd, *J* = 9.6, 2.6, 2.6 Hz, 1H) 2.65 (dd, *J* = 19.4, 9.8 Hz, 1H) 2.38 (d, *J* = 12.4, 1H) 2.43 (ddd, *J* = 11.9, 11.9, 2.8 Hz, 1H) 2.15 (dd, *J* = 19.4, 9.8 Hz, 1H) 1.84 (ddd, *J* = 12.8, 12.8, 4.9 Hz, 1H) 1.43 (ddd, *J* = 14.1, 14.1, 2.6 Hz, 1H) 0.90 (d, *J* = 7.0 Hz, 3H)

**<sup>13</sup>C NMR:** (100 MHz, CDCl<sub>3</sub>): δ 215.8, 173.1, 138.7, 128.8, 128.5, 127.3, 79.2, 62.7, 57.7, 51.7, 50.7, 48.4, 39.3, 31.9, 29.3, 15.4

**HRMS:** (ESI+) Calculated for C<sub>18</sub>H<sub>23</sub>NO<sub>4</sub>, 317.1627. Found 317.1625.

**Compound 11:** (*R*)-4-acetyl-3-methyl-5-oxohexanal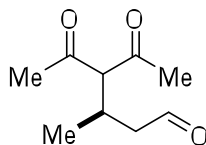

**Yield:** 27.0 mg, 70%, 60% ee as determined by conversion to **11b** *vide infra*

**Physical State:** colorless oil

**R<sub>f</sub>:** 0.2 (2:1 hex/EtOAc), Purified 2:1 hex/EtOAc

**<sup>1</sup>H NMR:** (400 MHz, CDCl<sub>3</sub>) δ 9.68 (s, 1H), 3.66 (d, *J* = 9.2 Hz, 1H), 2.88 (m, 1H), 2.38 (m, 1H), 2.26 (m, 1H), 2.17 (s, 6H), 0.94 (d, *J* = 5.1 Hz, 3H)

**<sup>13</sup>C NMR:** (100 MHz, CDCl<sub>3</sub>): δ 204.0, 203.7, 201.0, 74.0, 48.2, 30.4, 29.8, 28.3, 18.2.

**Compound 11b:** (*R,E*)-ethyl 6-acetyl-5-methyl-7-oxooct-2-enoate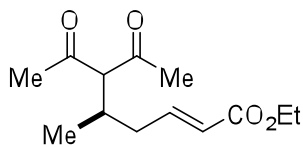

**Yield:** 21.0 mg, 75%, 60% ee (Major olefin isomer).

**Physical State:** colorless oil

**R<sub>f</sub>:** 0.4 (2:1 hex/EtOAc), Purified 4:1 hex/EtOAc

**[α]<sub>D</sub><sup>21</sup>** = -41.3 (c = 0.010 g/ml, CH<sub>2</sub>Cl<sub>2</sub>)

**HPLC Analysis:** Chiracel A-DH column 97:3 hexanes/*iso*-propanol, 1.0 mL/min; peaks appear at 11.85 minutes (minor) and 13.00 minutes (minor).

**IR:** (NaCl, neat) 2977, 2936, 1716, 1698, 1651, 1360, 1268, 1179, 1044 cm<sup>-1</sup>

**<sup>1</sup>H NMR:** (400 MHz, CDCl<sub>3</sub>) δ 6.81 (ddd, *J* = 15.3, 8.5, 6.6 Hz, 1H), 5.77 (ddd, *J* = 15.6, 1.3, 1.3 Hz, 1H) 4.14 (q, *J* = 14.3, 7.0 Hz, 2H), 3.50 (d, *J* = 10.2 Hz, 1H), 2.53 (m, 1H) 2.16 (m, 1H) 2.13 (s, 3H), 2.12 (s, 1H), 1.97 (m, 1H), 1.24 (t, *J* = 7.0 Hz, 3H), 0.86 (d, *J* = 6.8 Hz).

**$^{13}\text{C}$  NMR:** (100 MHz,  $\text{CDCl}_3$ ):  $\delta$  204.0, 203.8, 166.3, 145.5, 124.1, 75.3, 60.5, 37.0, 32.0, 30.1, 29.7, 17.3, 14.4

**HRMS:** (ESI+) Calculated for  $\text{C}_{13}\text{H}_{21}\text{O}_4$  240.1362, Found 240.1363

**Compound 13:** (2*S*,3*R*,4*S*)-3-benzoyl-2-hydroxy-2,4-dimethylcyclopentanone

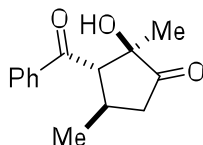

### Major Diastereomer

**Yield:** 39.0 mg, 74%, 87% ee (Major) 4:1 Major: $\Sigma$  Minor (Major diastereomer is separable from other regio- and diastereomers).

**Physical State:** white solid, mp = 87-90 °C (from  $\text{CH}_2\text{Cl}_2$ )

**R<sub>f</sub>:** 0.5 (2:1 hex/EtOAc), Purified 5:1 hex/EtOAc

**$[\alpha]_D^{21}$**  = -62.0 (c = 0.010 g/ml,  $\text{CH}_2\text{Cl}_2$ )

**GC Analysis:** Chiraldex BDM-2 column at 170 °C at 2 mL/min; peaks appear at 19.37 minutes (major) and 20.06 minutes (minor).

**IR:** (NaCl, neat) 3471 (br), 2961, 2929, 2869, 1751, 1672, 1451, 1368, 1213  $\text{cm}^{-1}$

**$^1\text{H}$  NMR:** (400 MHz,  $\text{CDCl}_3$ )  $\delta$  8.12 (d,  $J$  = 7.2 Hz, 2H) 7.57 (t,  $J$  = 7.6 Hz, 1H) 7.46 (t,  $J$  = 7.6 Hz, 2H) 3.66 (d,  $J$  = 10.7 Hz, 1H) 2.84 (m, 1H) 2.76 (dd,  $J$  = 19.0, 8.7 Hz, 1H) 2.06 (dd,  $J$  = 19.2, 10.2 Hz, 1H) 1.06 (d,  $J$  = 6.2 Hz, 3H), 1.05 (s, 3H)

**$^{13}\text{C}$  NMR:** (100 MHz,  $\text{CDCl}_3$ ):  $\delta$  217.9, 199.2, 138.0 133.7, 129.4, 128.7, 80.8, 61.0, 41.6, 28.2, 20.7, 19.7

**HRMS:** (ESI+) Calculated for  $\text{C}_{14}\text{H}_{16}\text{O}_3$ , 232.1099. Found 232.1096.

**References**

- (1) Avery, T. A.; Caiazza, D.; Culbert, J. A.; Taylor, D. K.; Tienkink, E. R. T. *J. Org. Chem.* **2005**, *70*, 8344.
- (2) Kang, J.; Lim, G. J.; Yoon, S. K.; Kim, M. Y. *J. Org. Chem.* **1995**, *60*, 564.
- (3) Boone, M. A.; McDonald, F. E.; Lichter, J.; Lutz, S.; Cao, R.; Hardcastle, K. I. *Org. Lett.* **2009**, *11*, 851.
- (4) Xie, X.; Lu, X.; Xu, W. *J. Org. Chem.* **2001**, *66*, 6545.
- (5) Lutz, C.; Lutz, V.; Knochel, P. *Tetrahedron* **1998**, *54*, 6385.
- (6) Li, A.-H.; Moro, S.; Melman, N.; Ji, X.; Jacobson, K. A. *J. Med. Chem.* **1998**, *41*, 3186.
- (7) Marigo, M.; Wabnitz, T. C.; Fielenbach, D.; Jørgensen, K. A. *Angew. Chem. Int. Ed.* **2005**, *44*, 794.
- (8) Kerr, M. S.; Read de Alaniz, J.; Rovis, T. *J. Org. Chem.* **2005**, *70*, 5725.

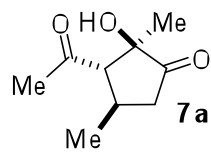

mixture of diastereomers

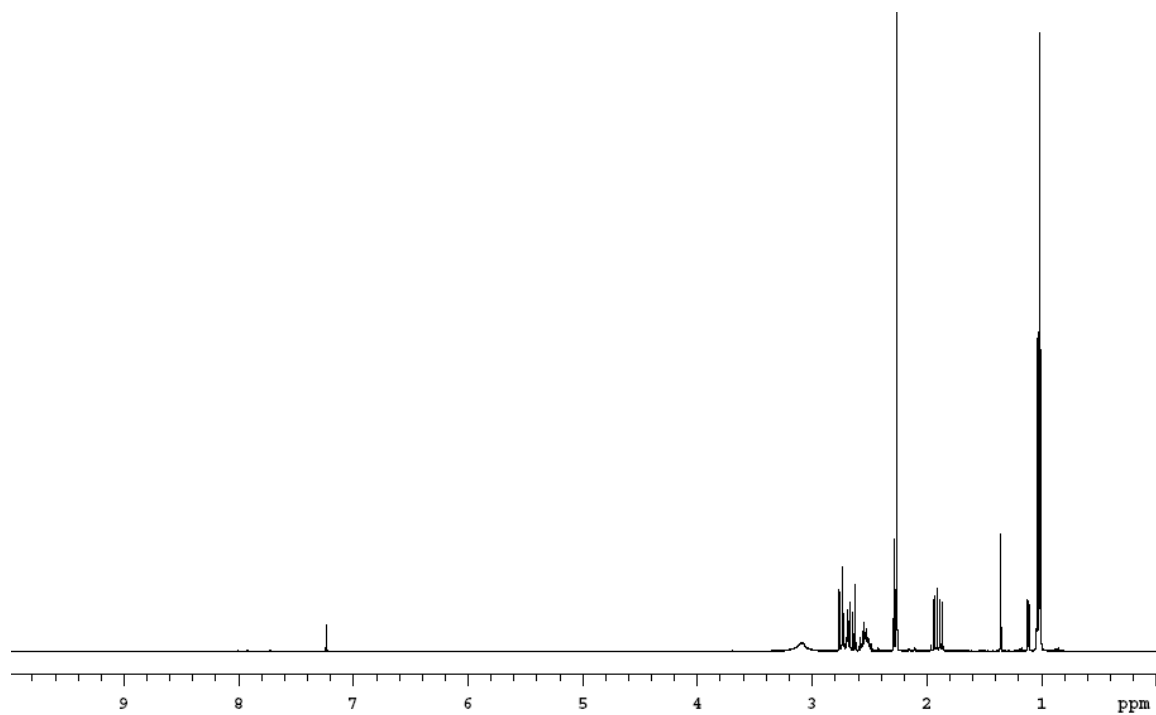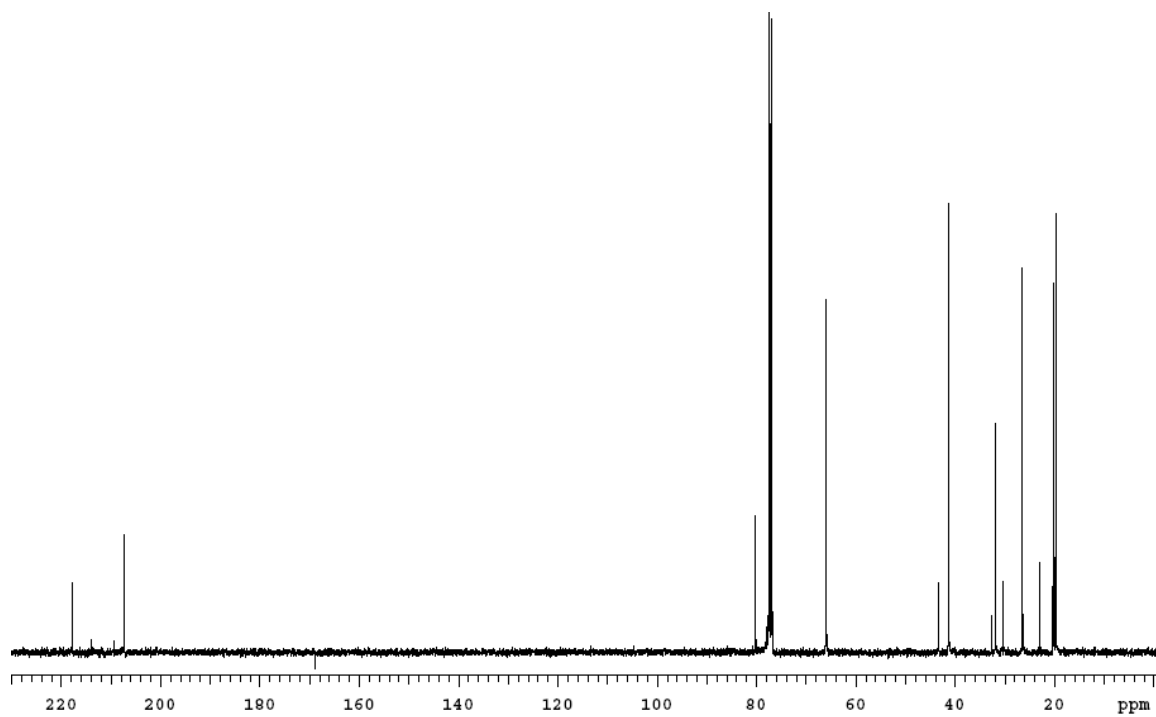



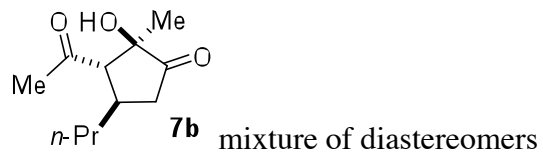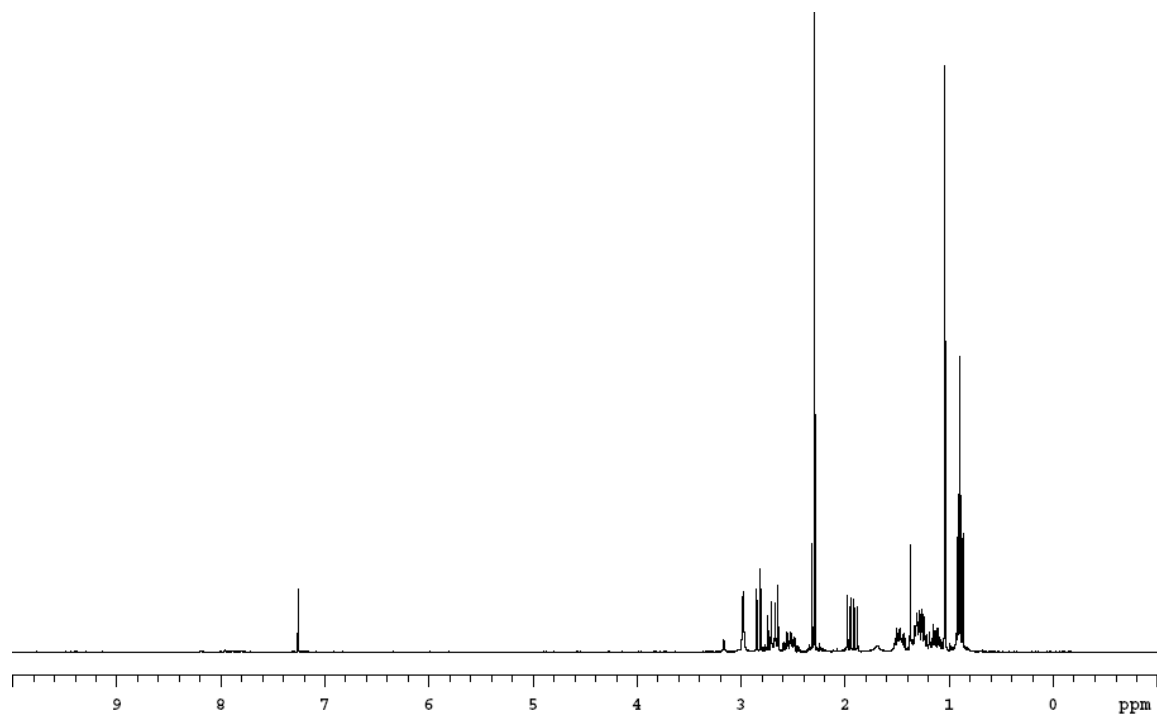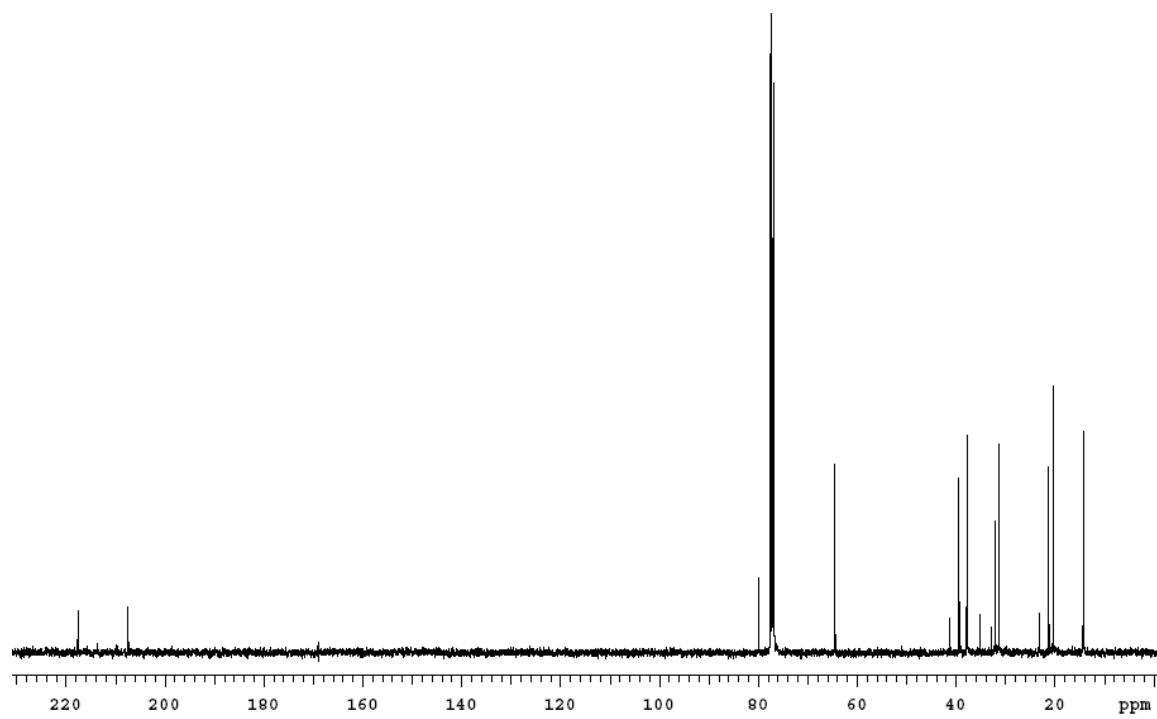

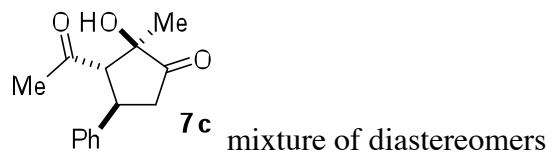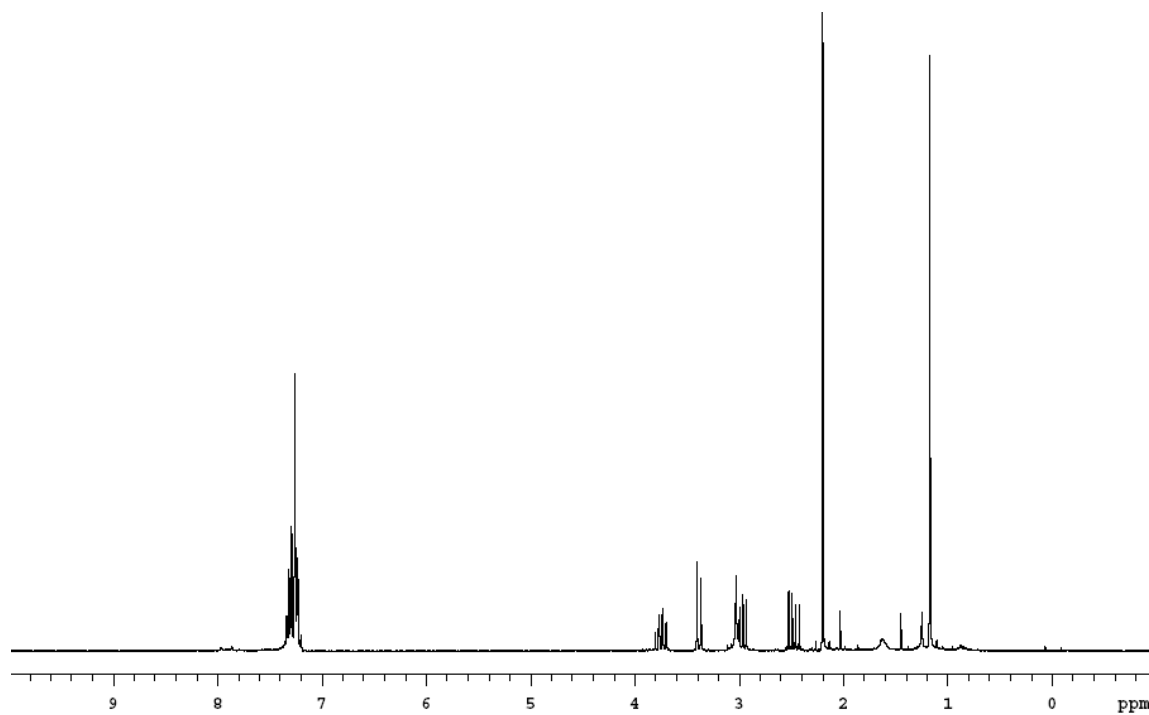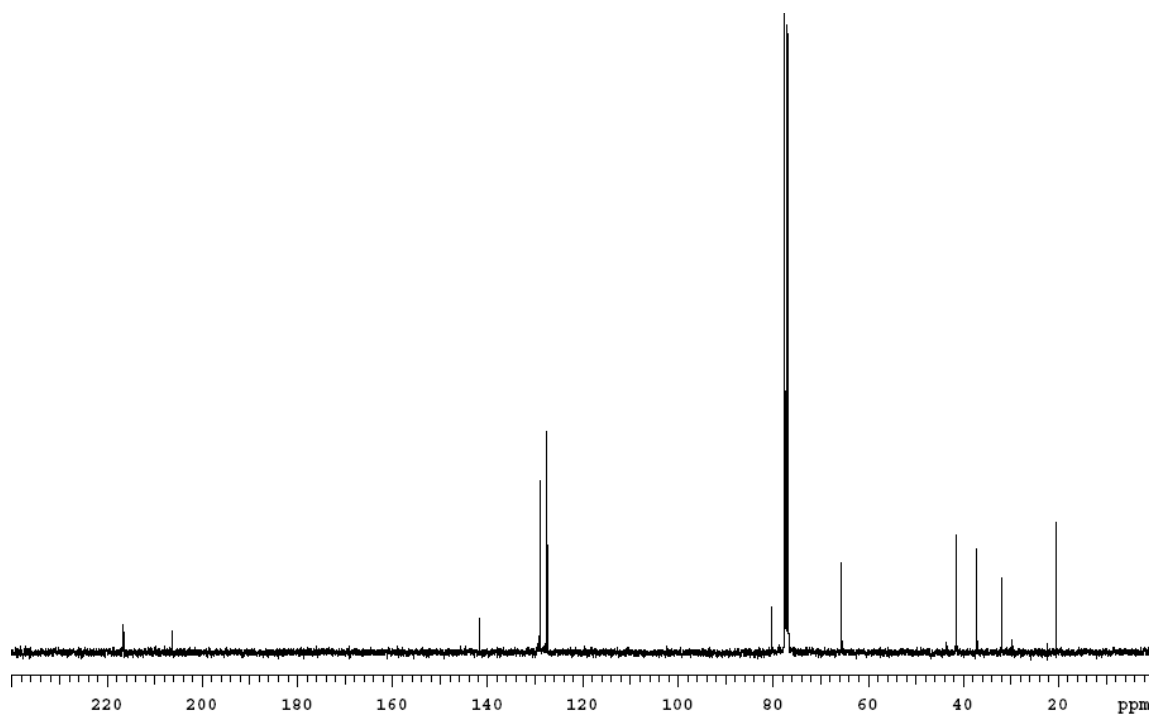

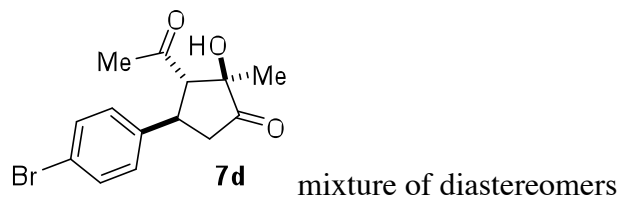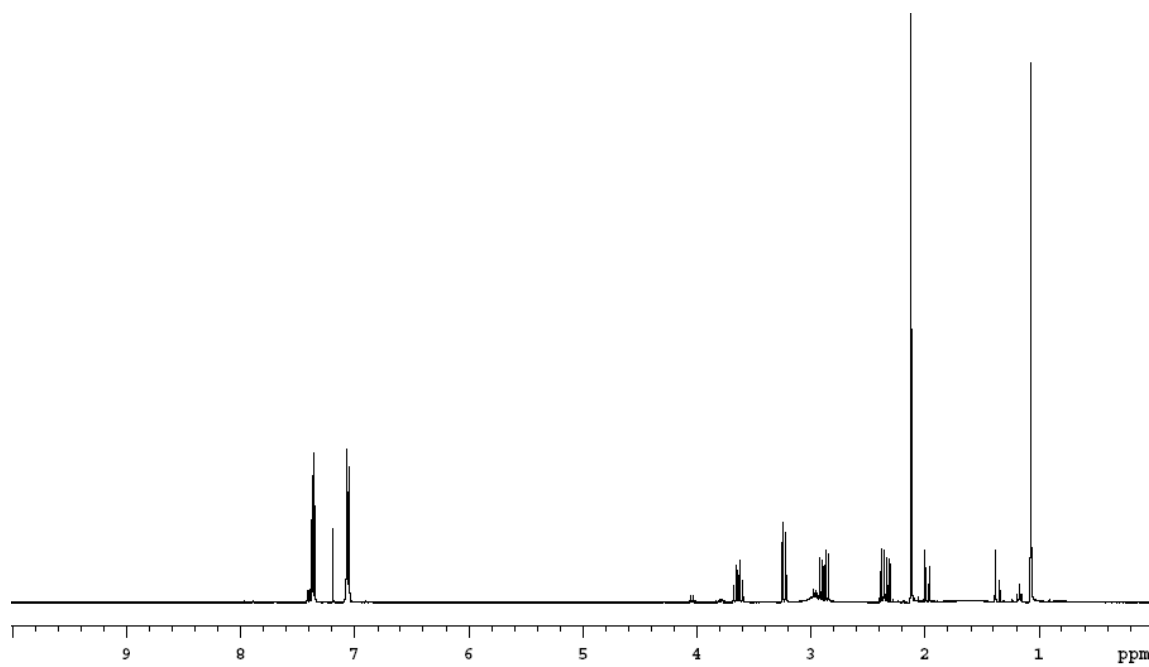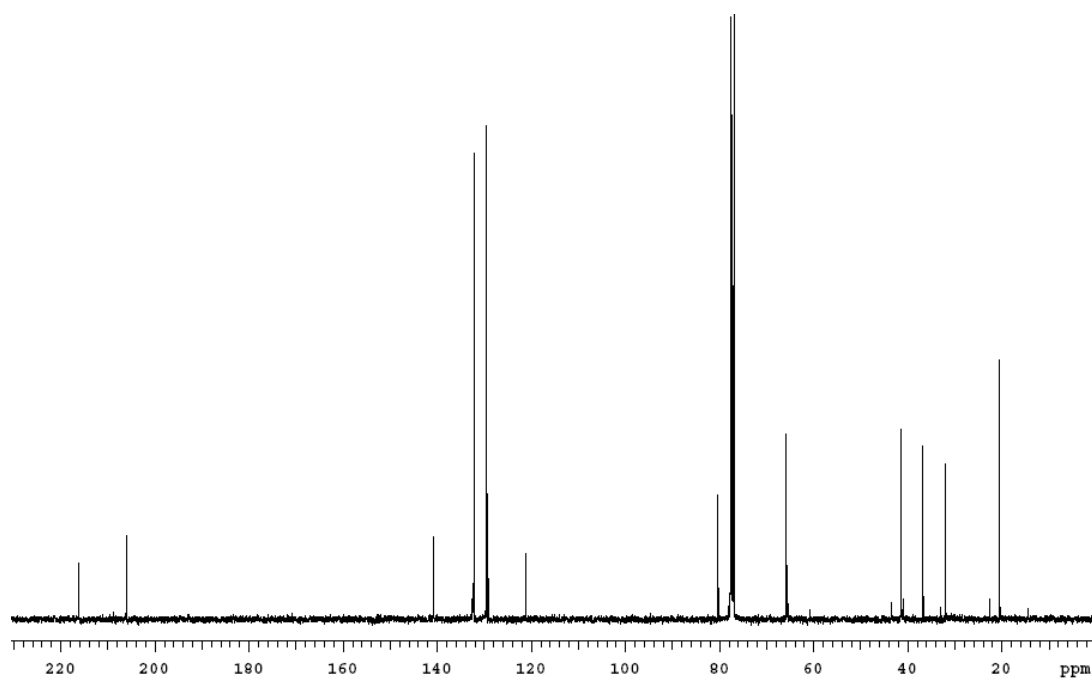

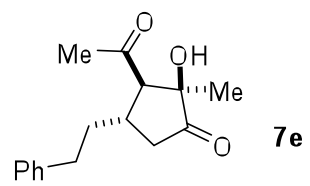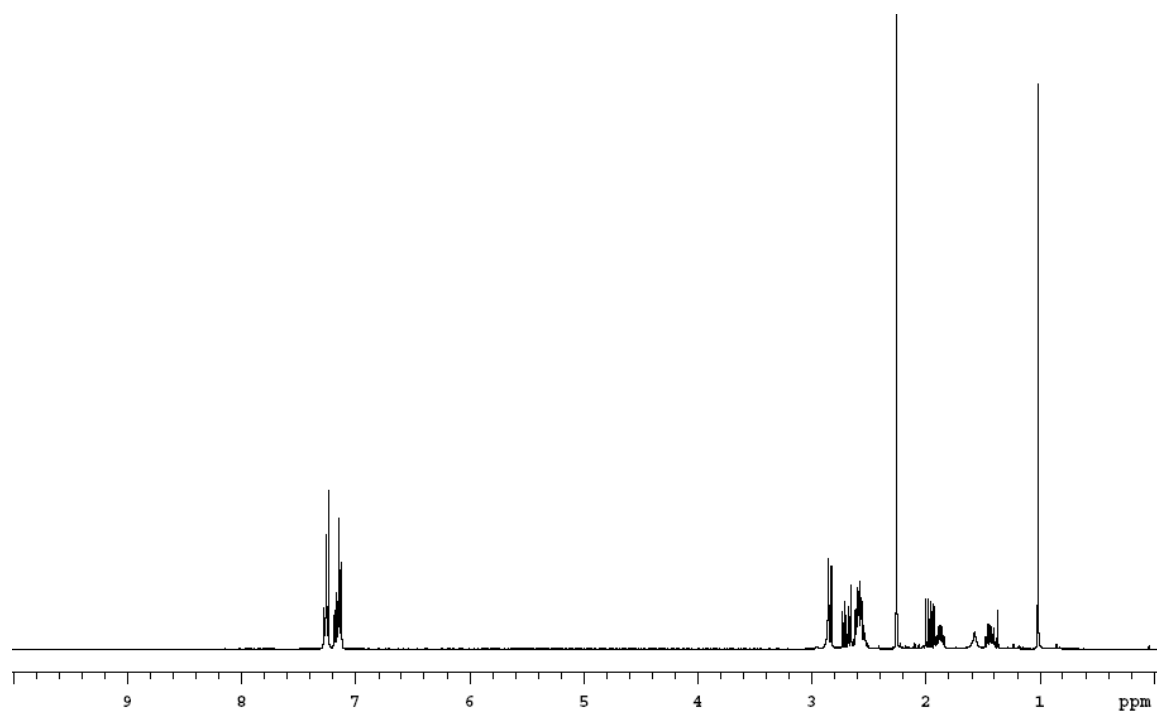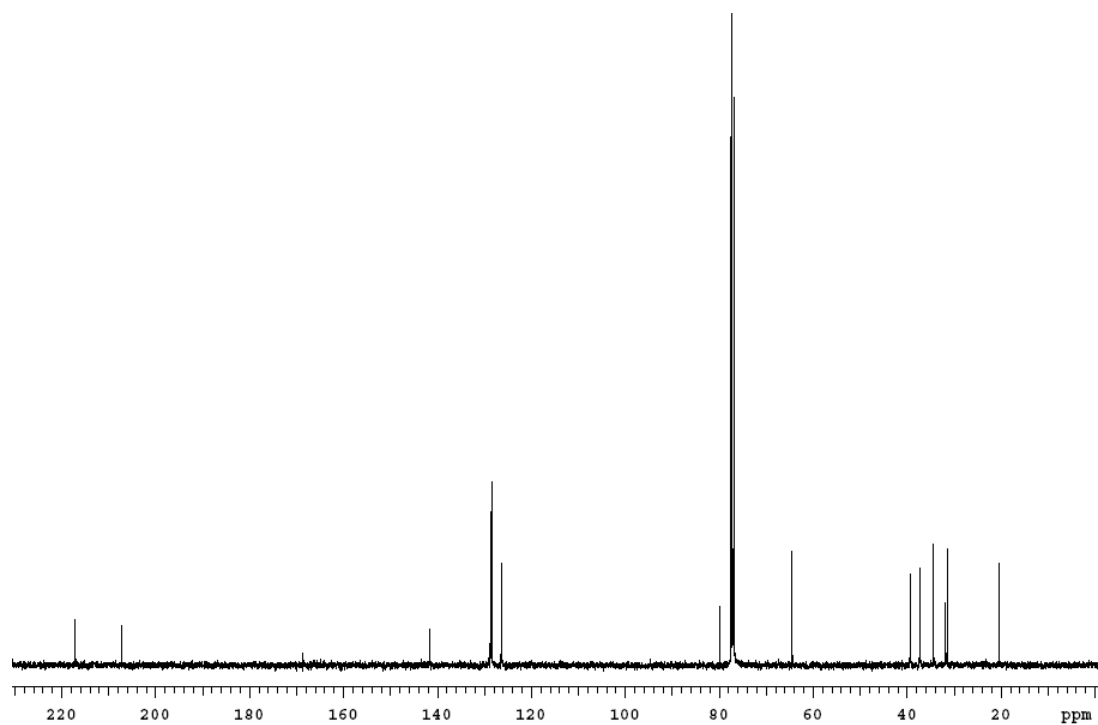

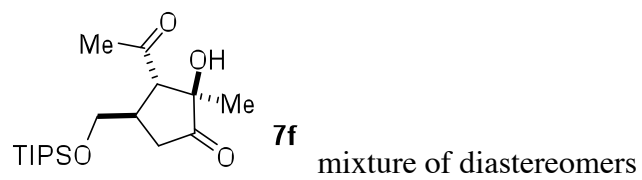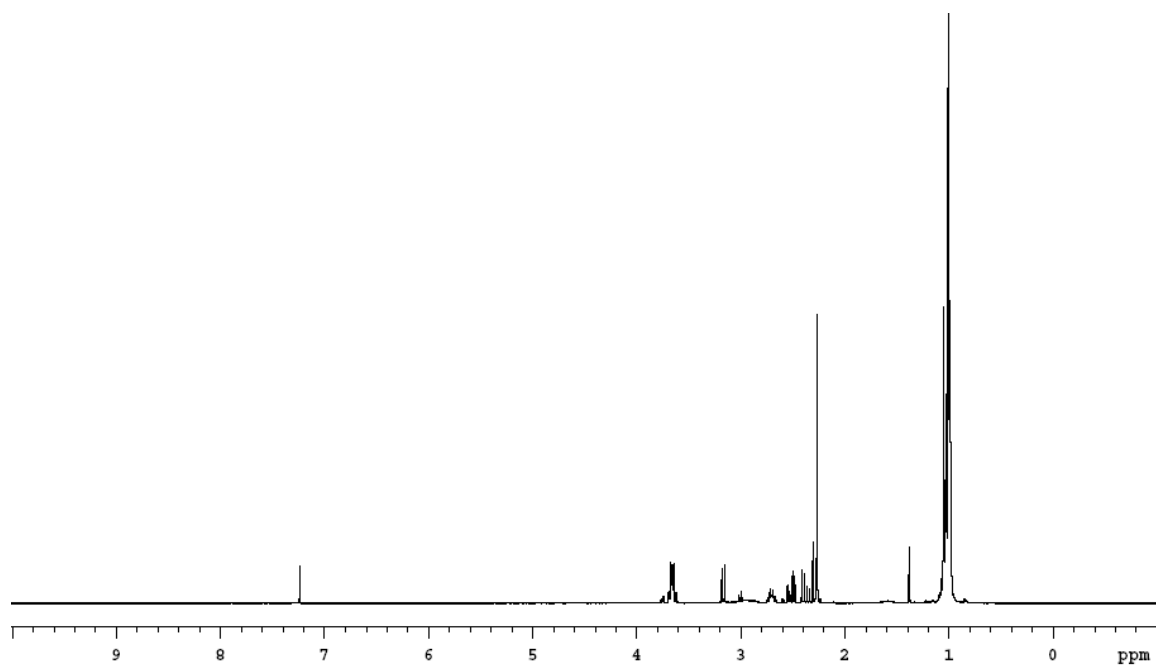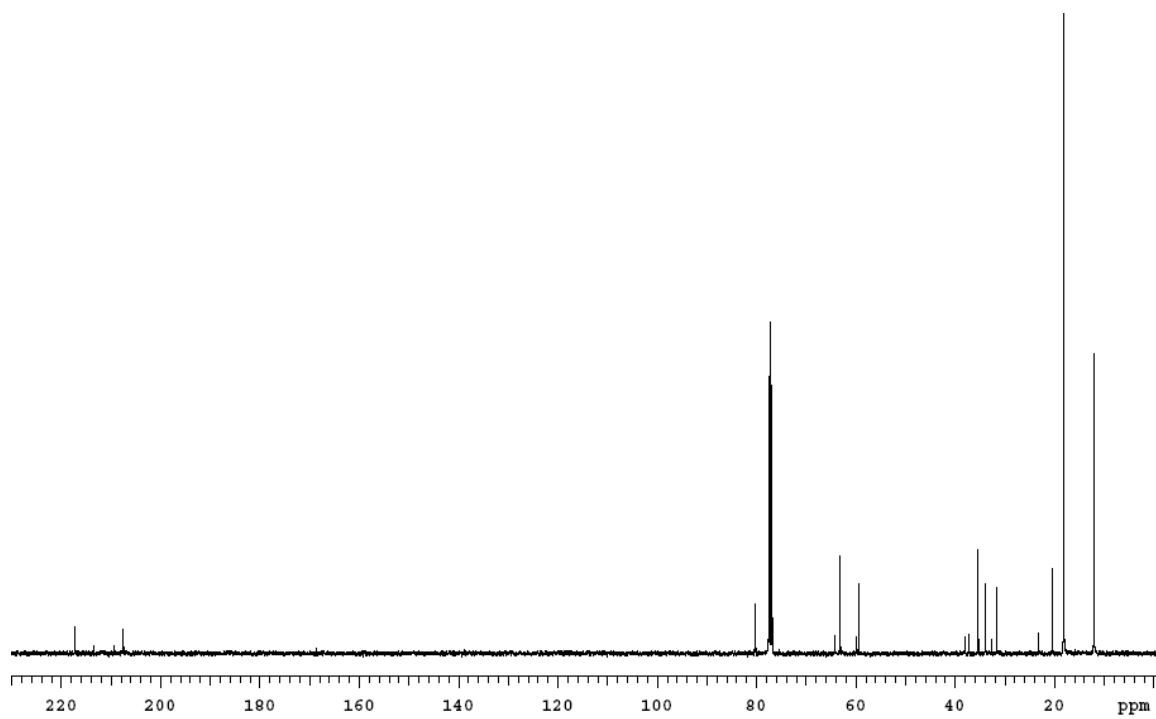

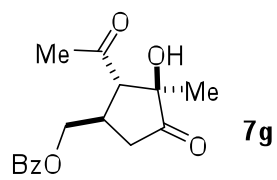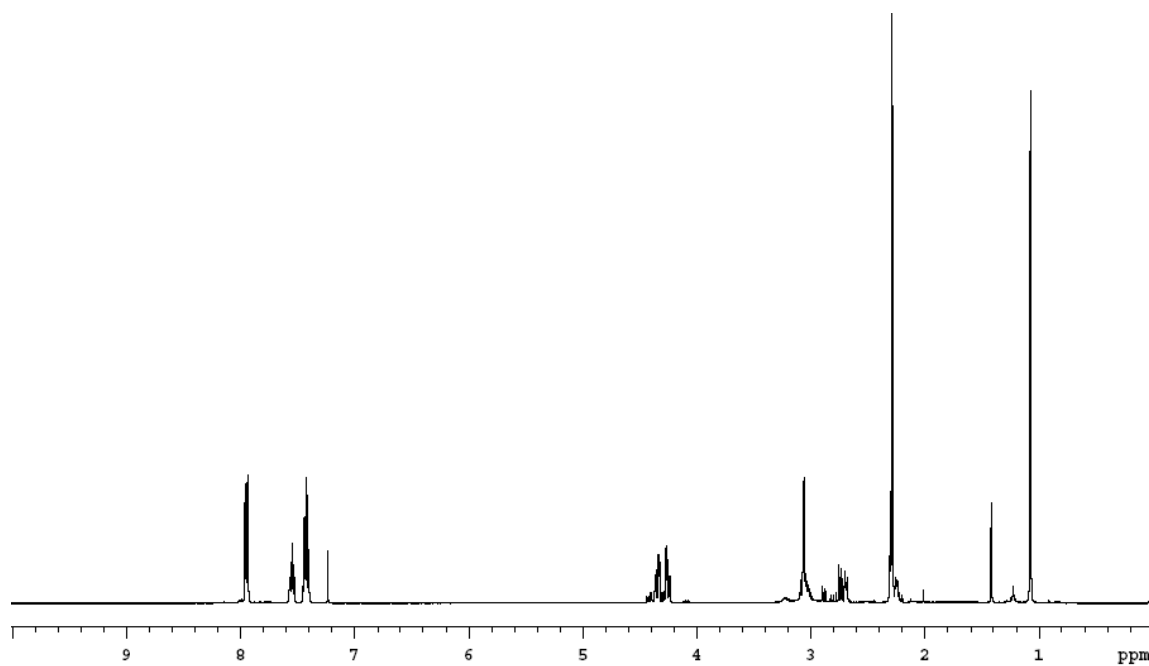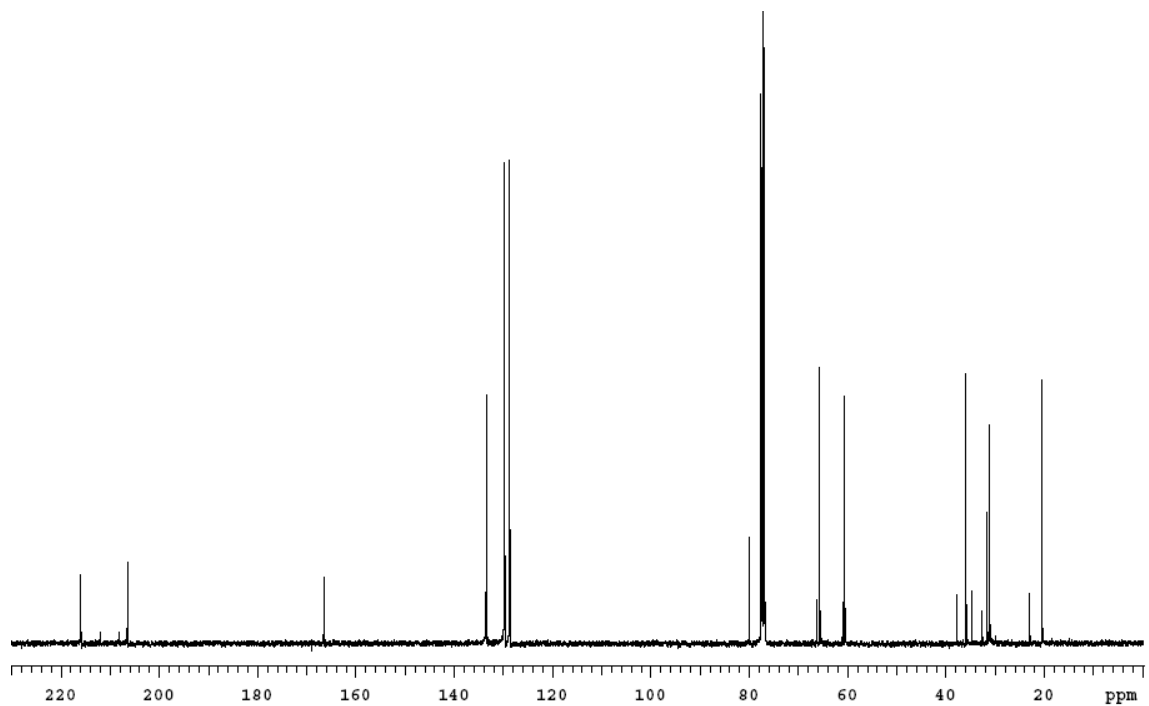

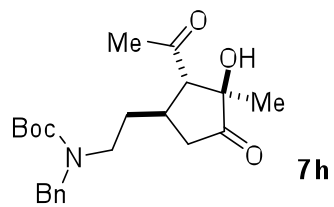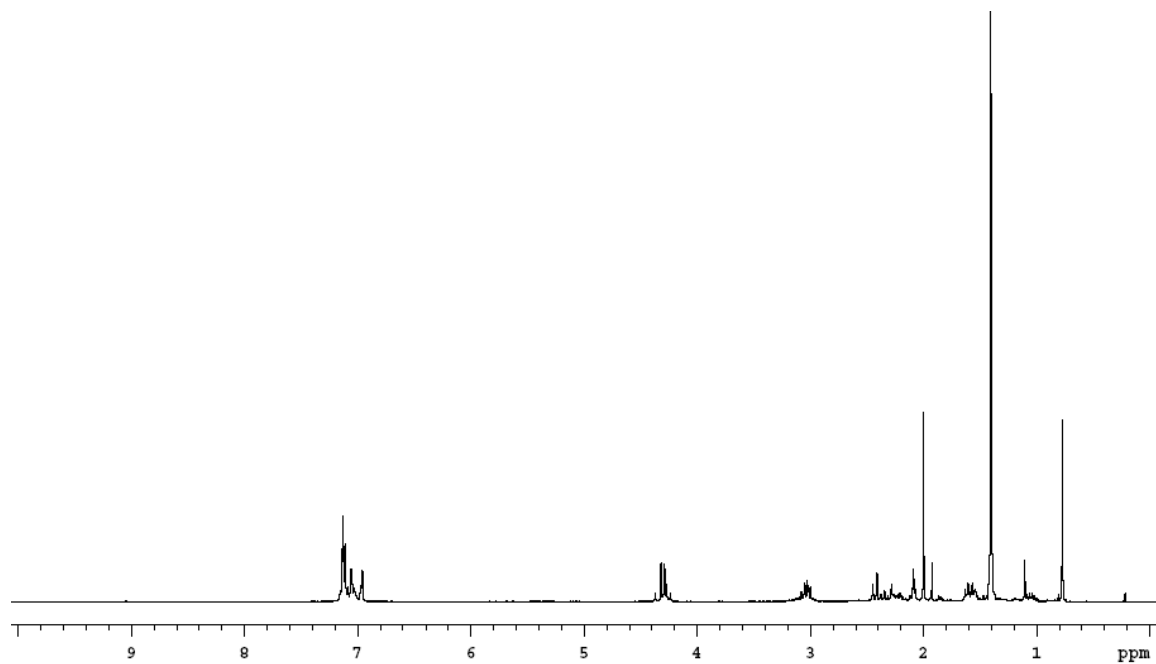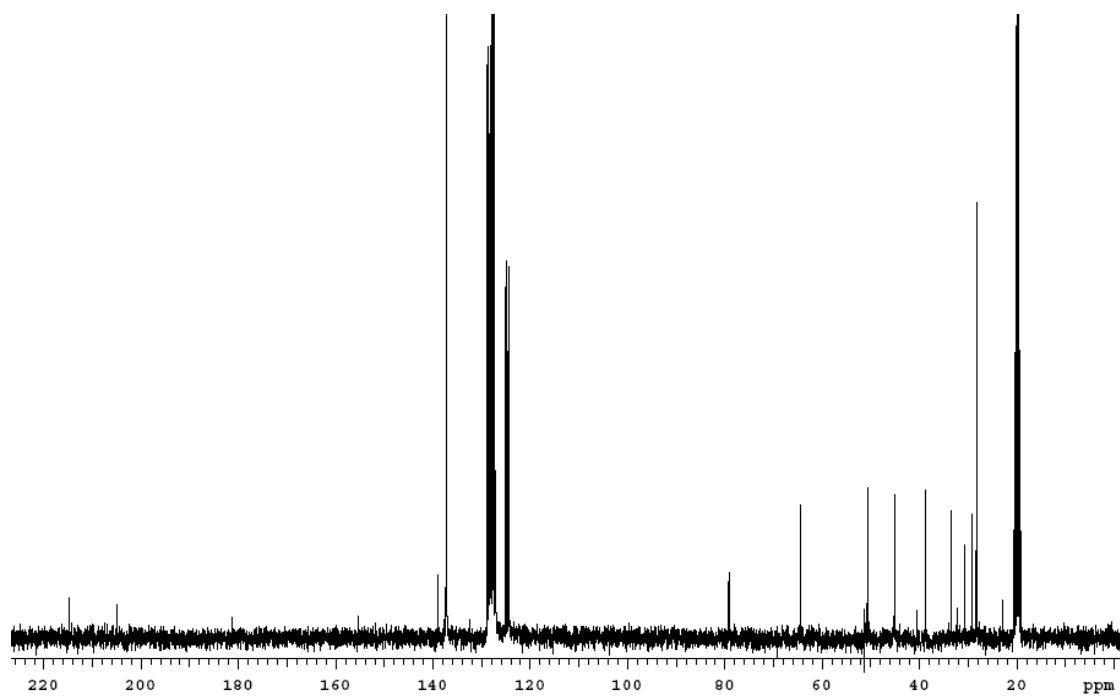

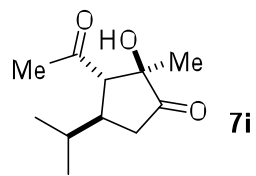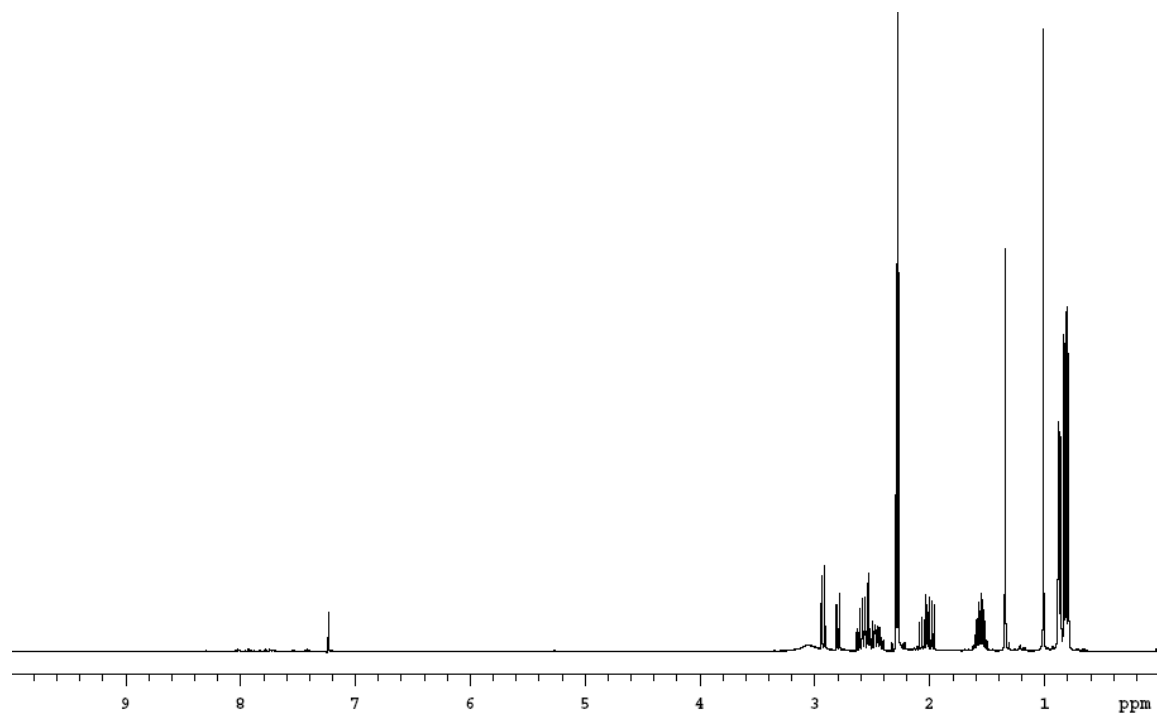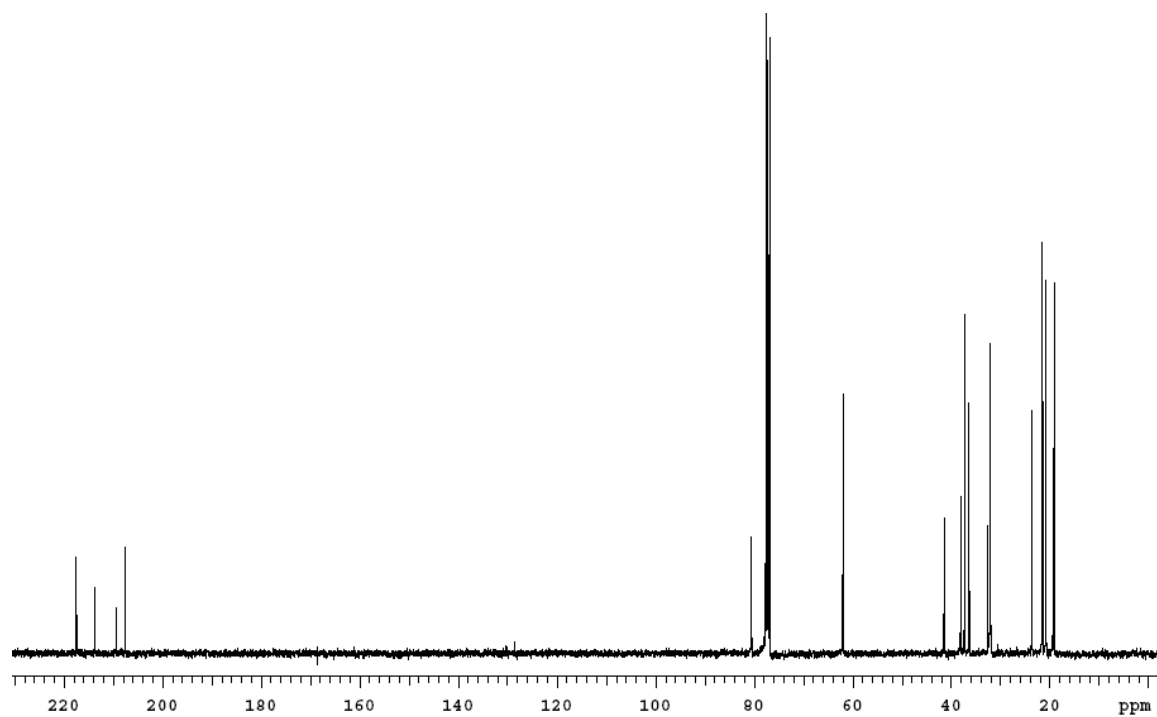



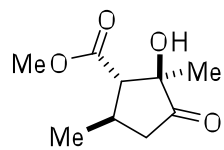**10a** major diastereomer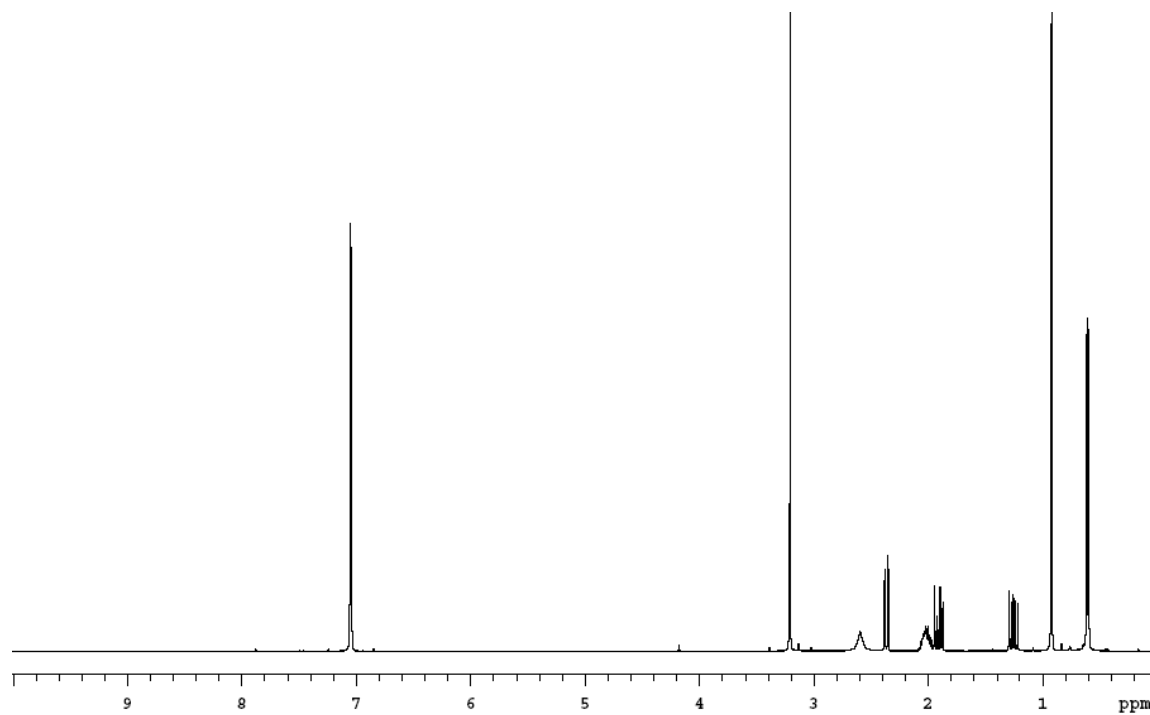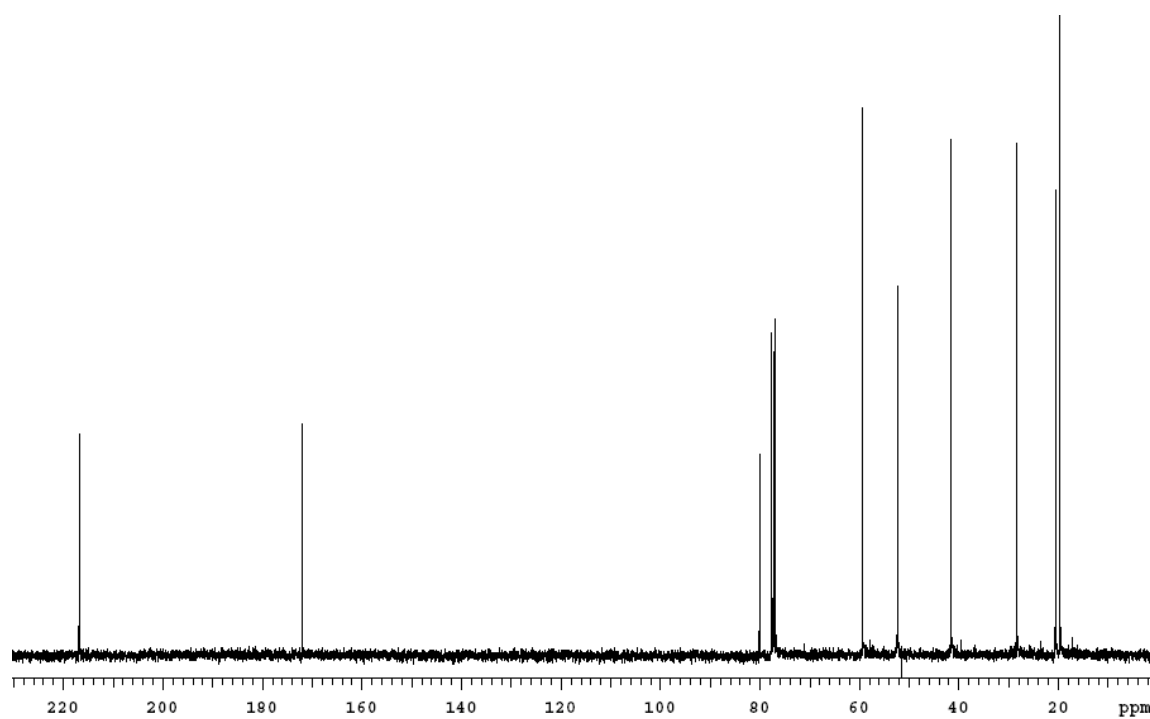

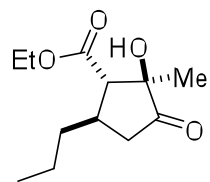**10b** major diastereomer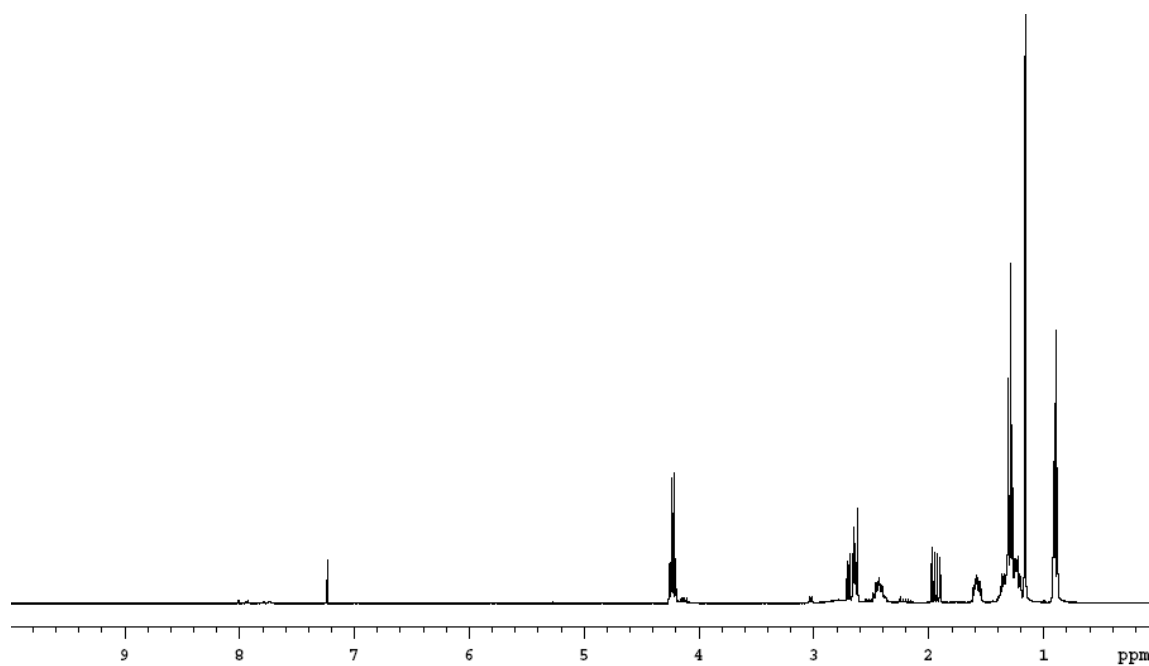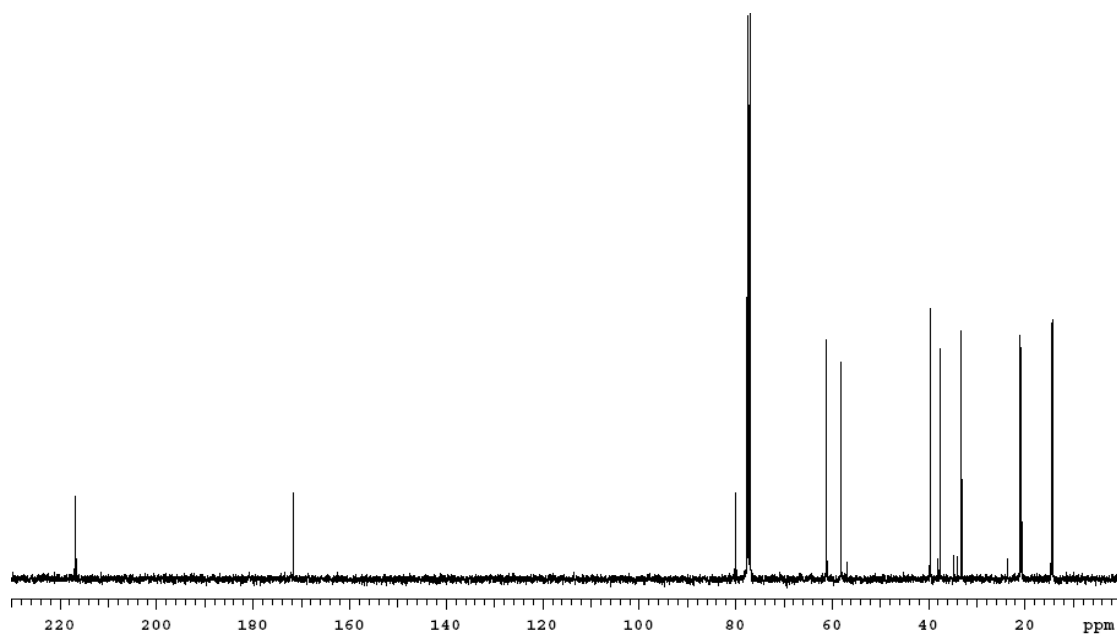

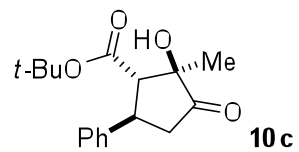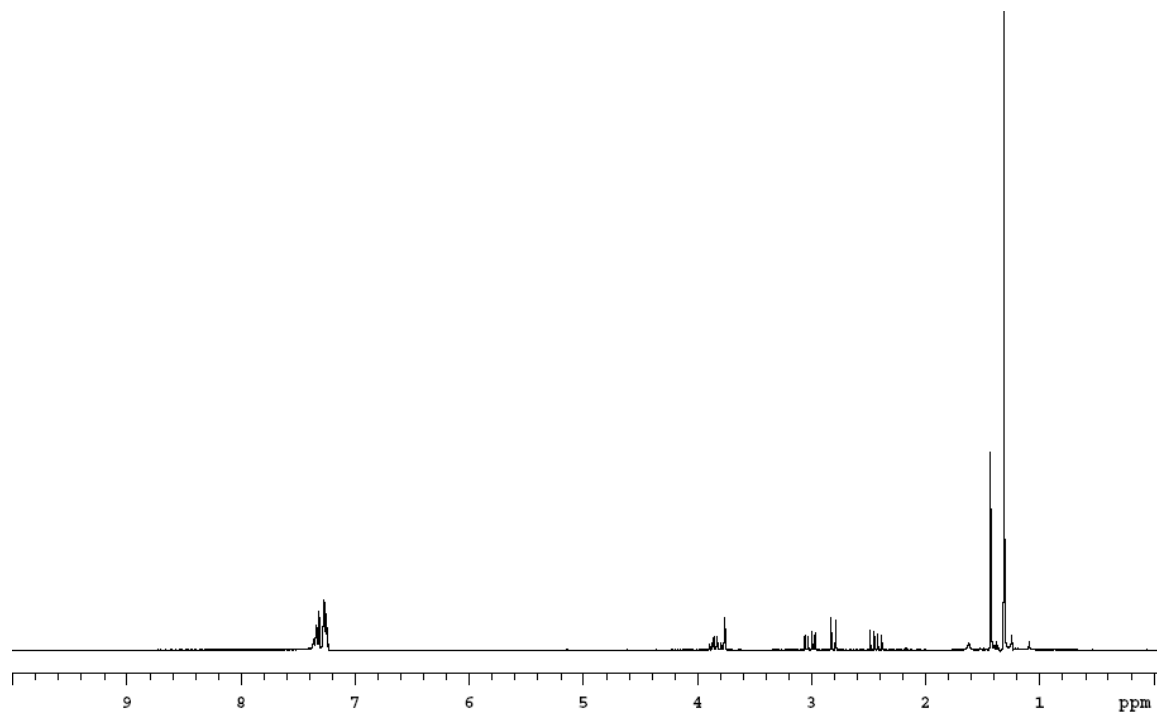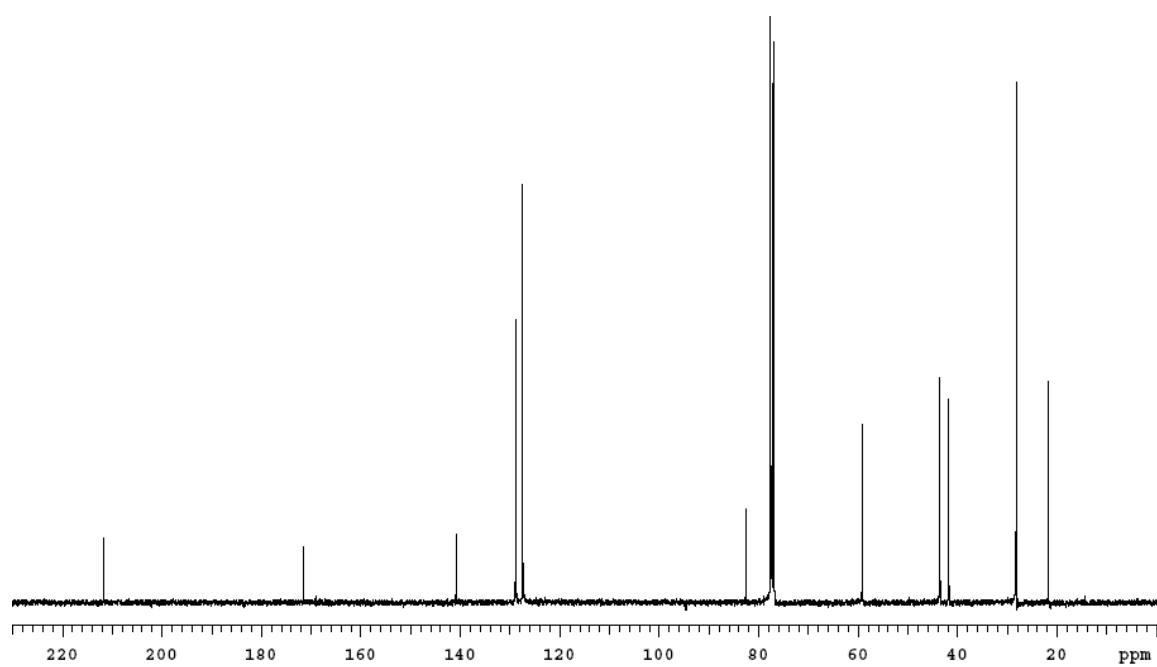

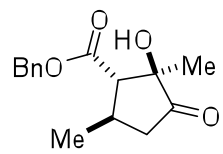**10d** Major diastereomer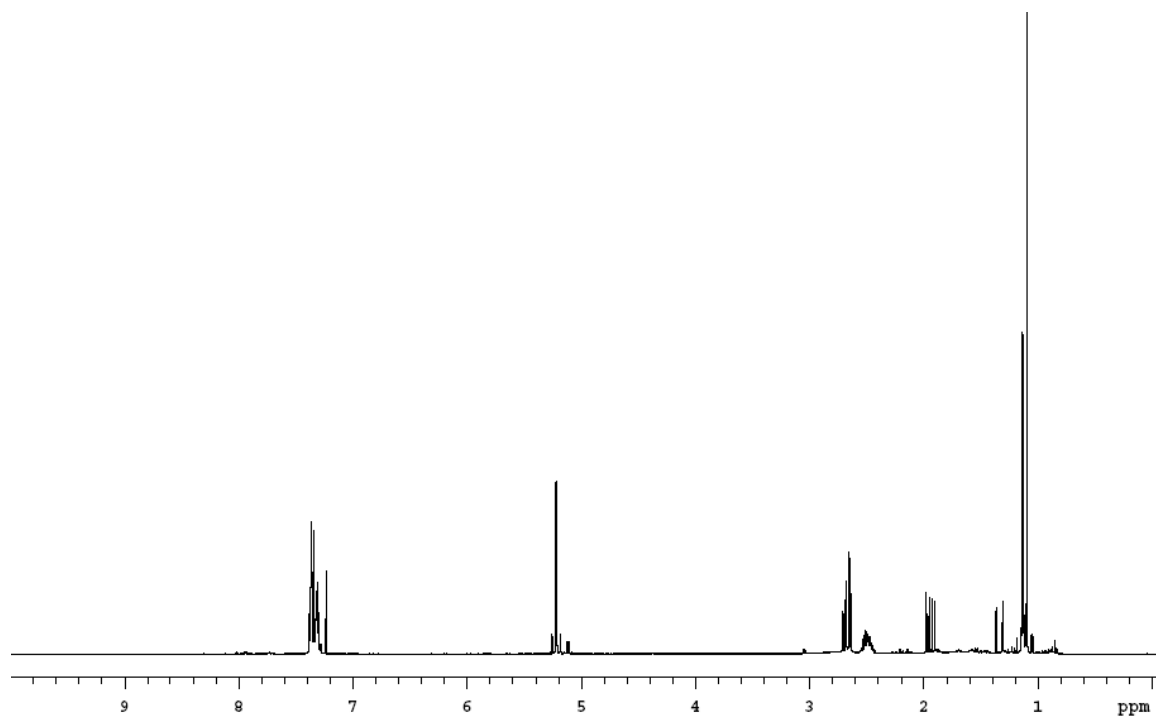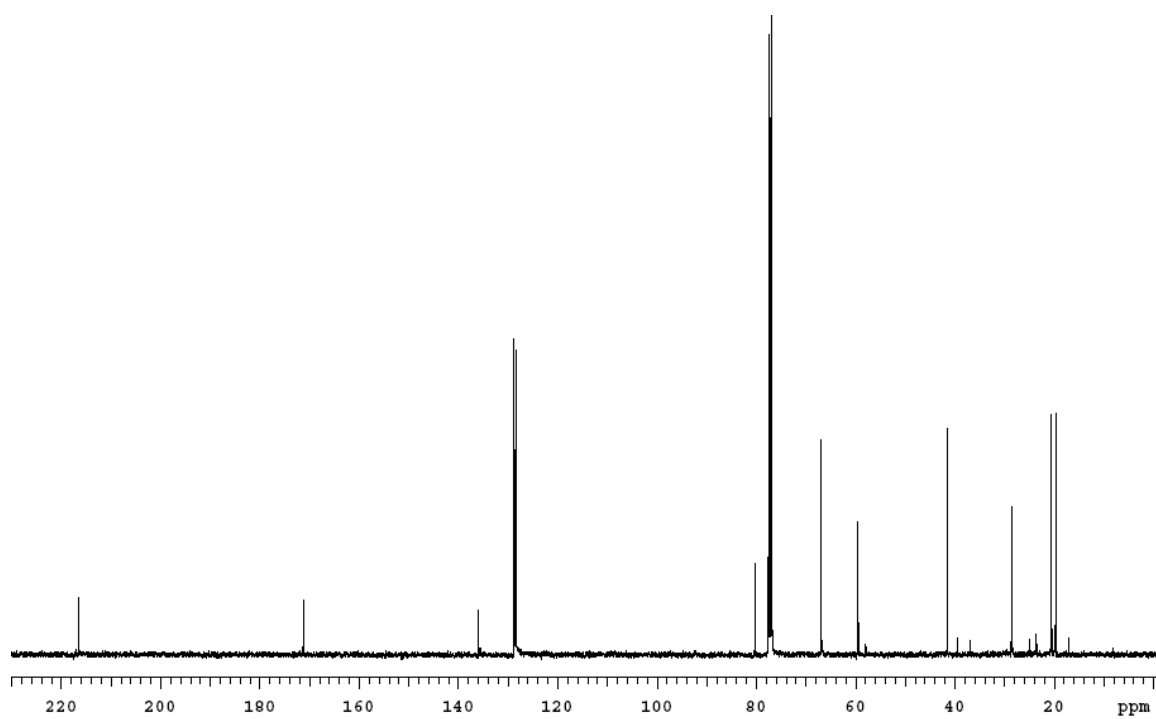

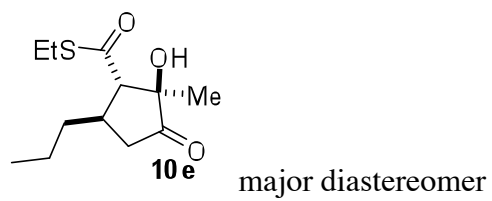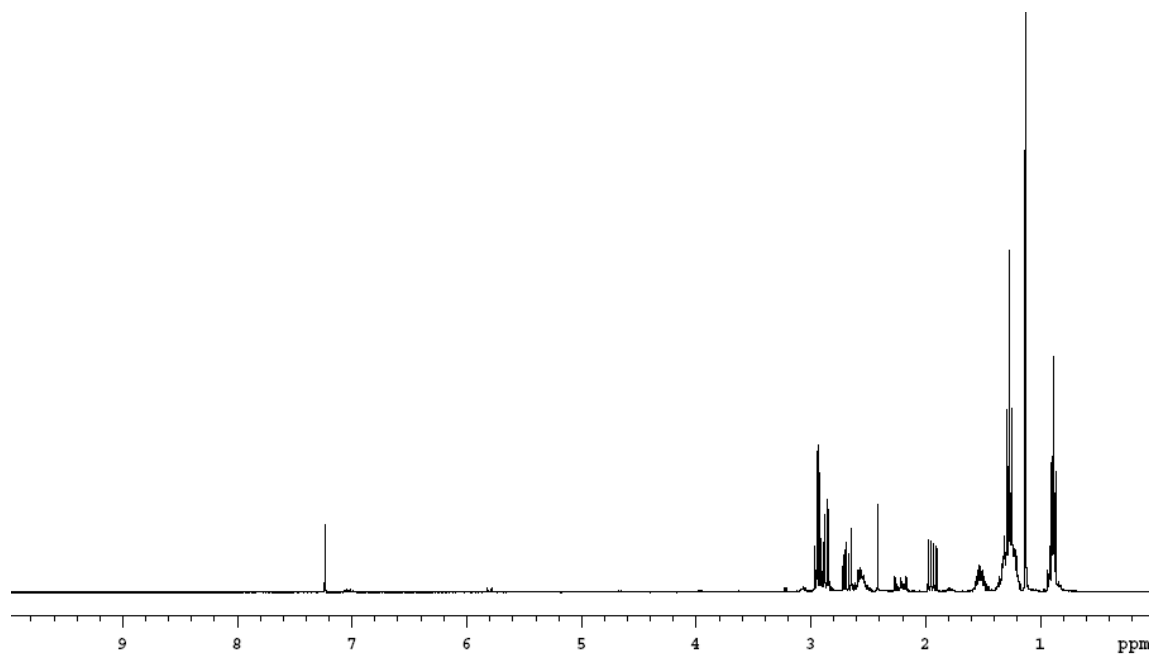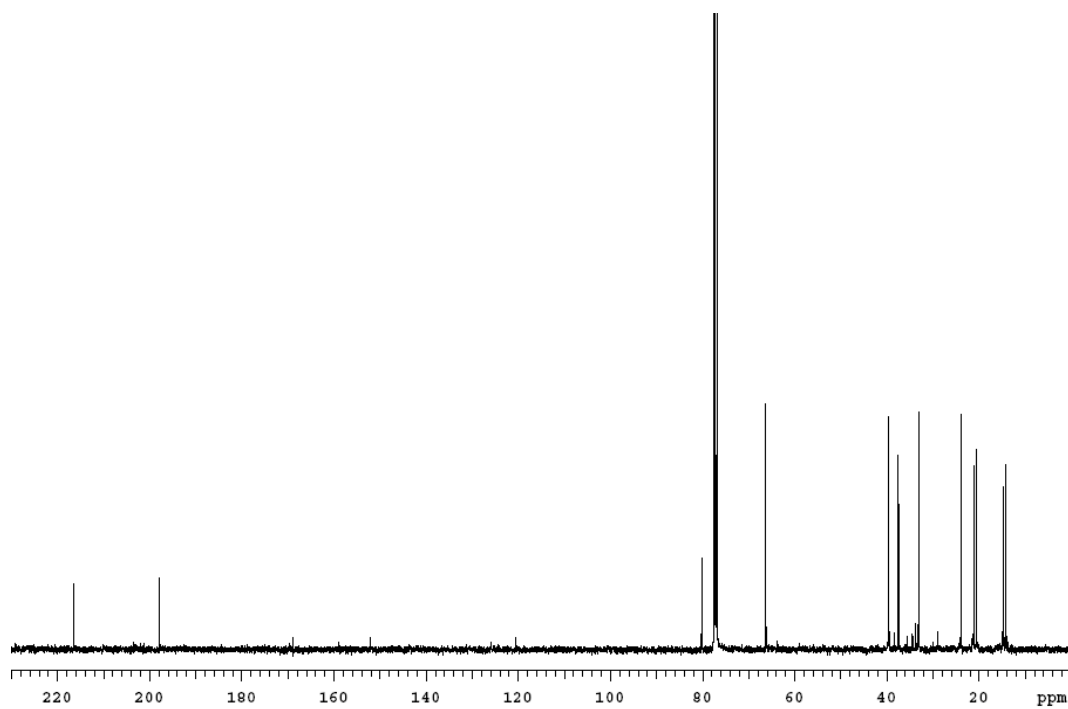

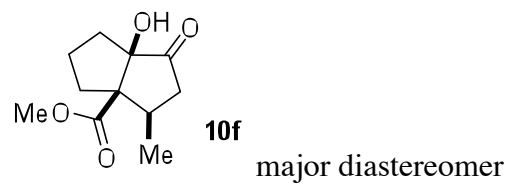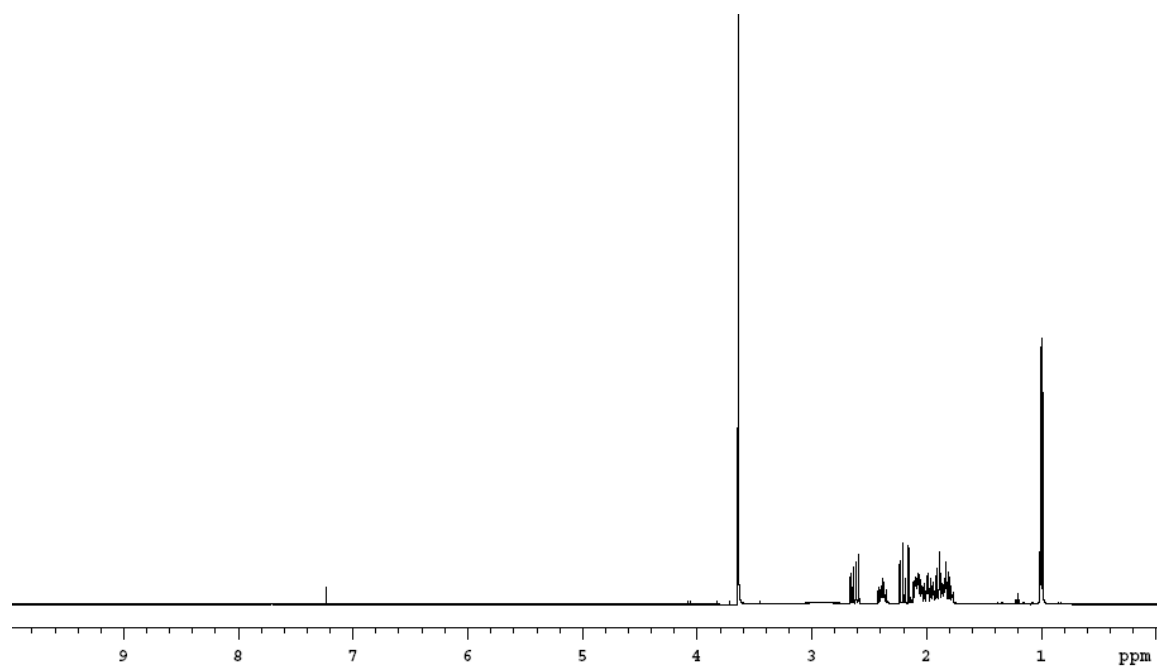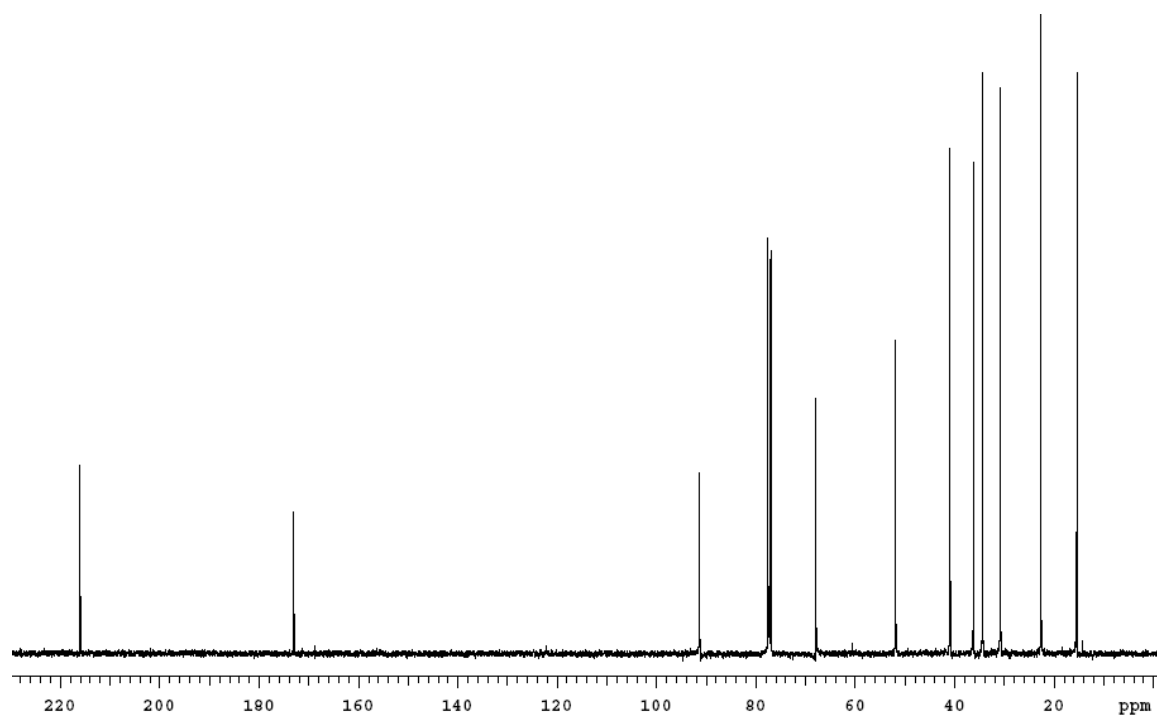

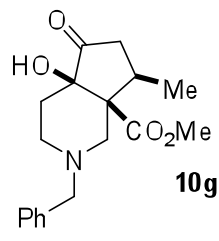

major diastereomer

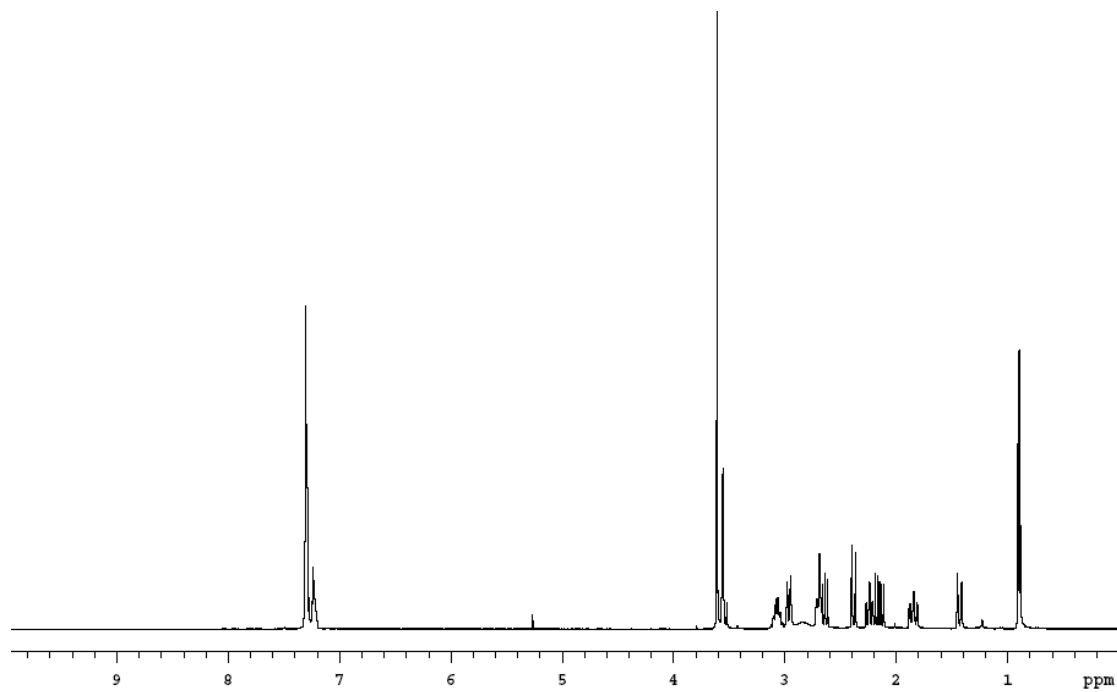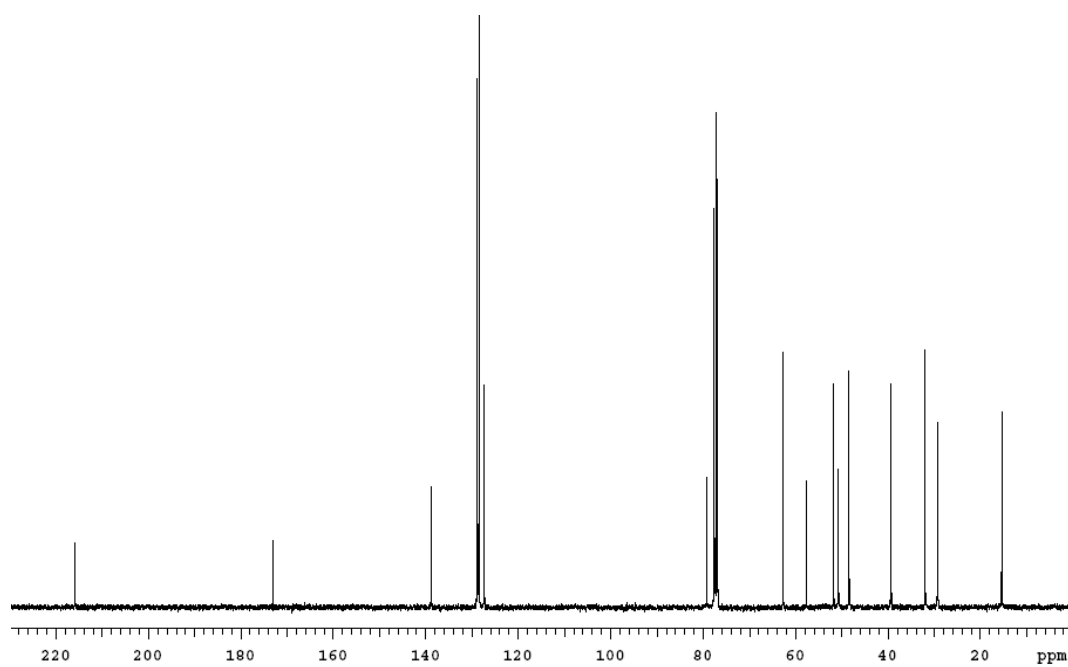

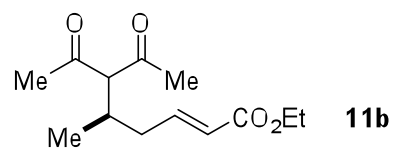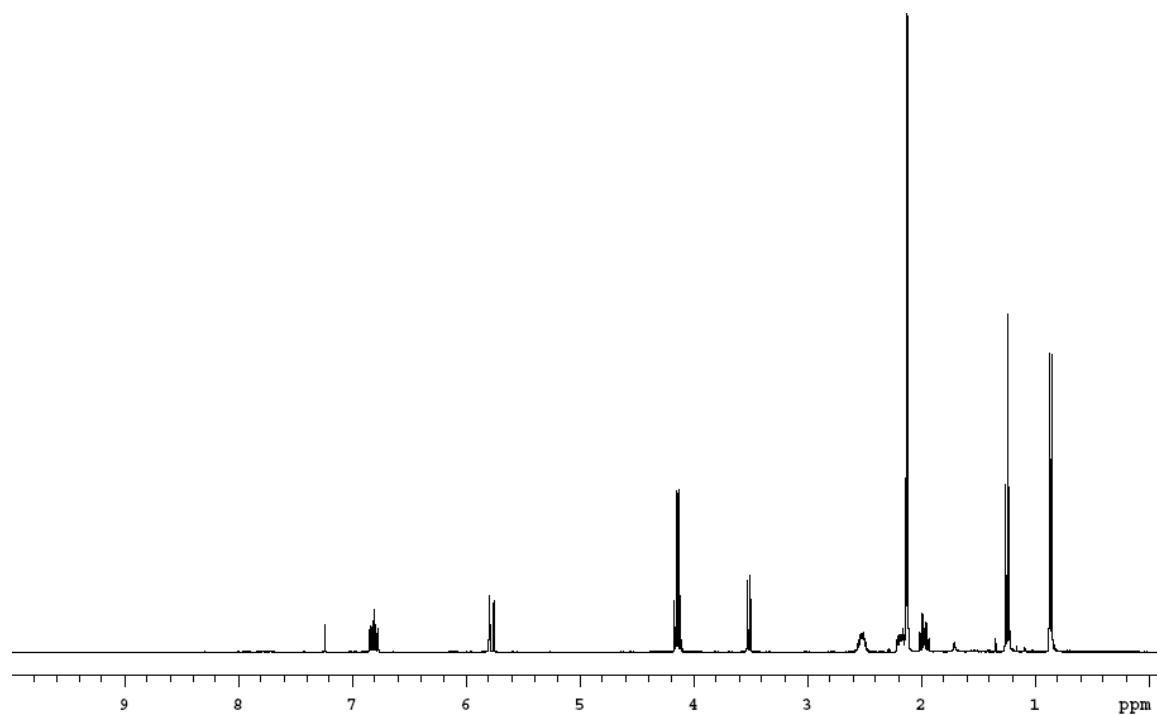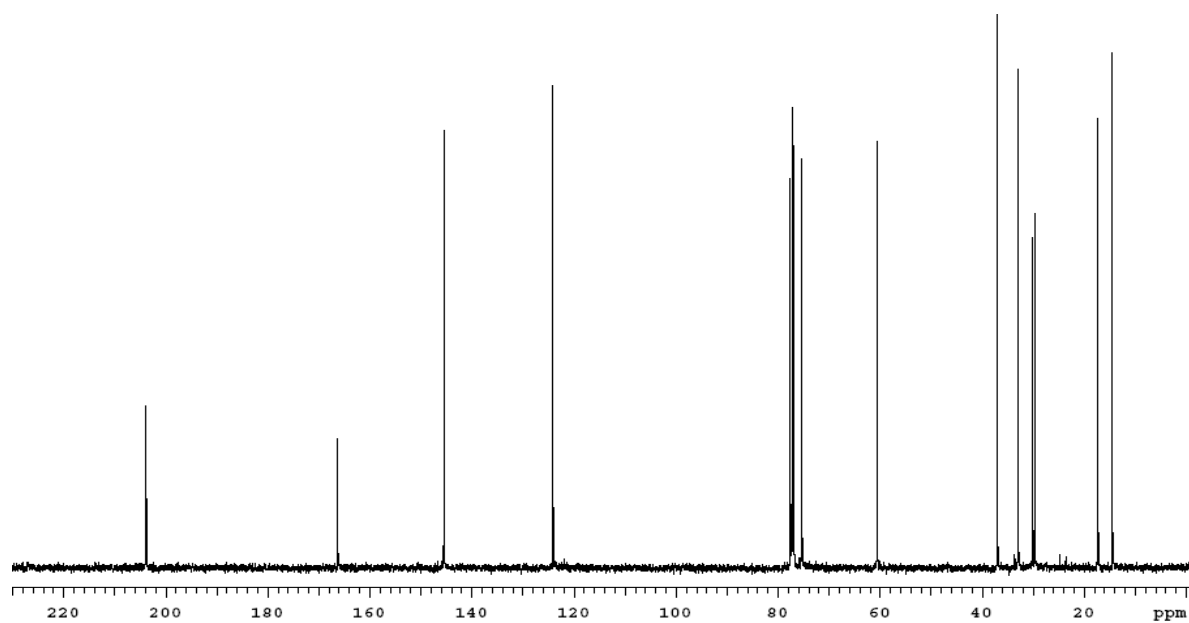



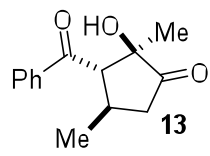

major diastereomer and regioisomer

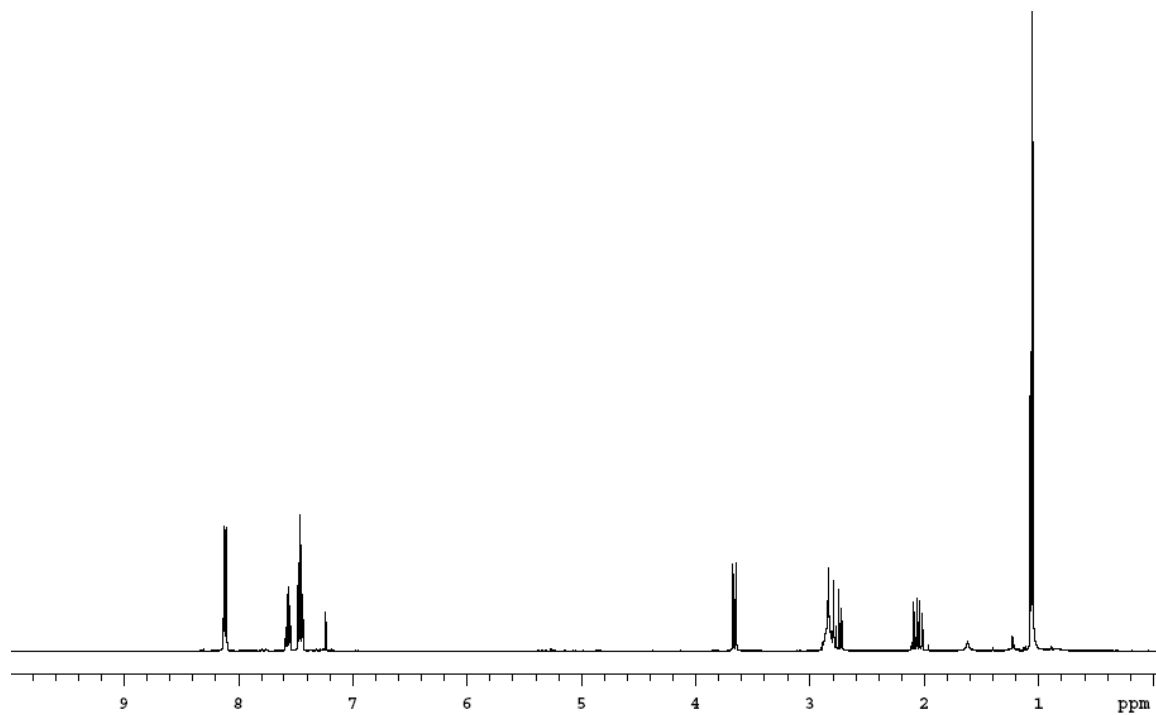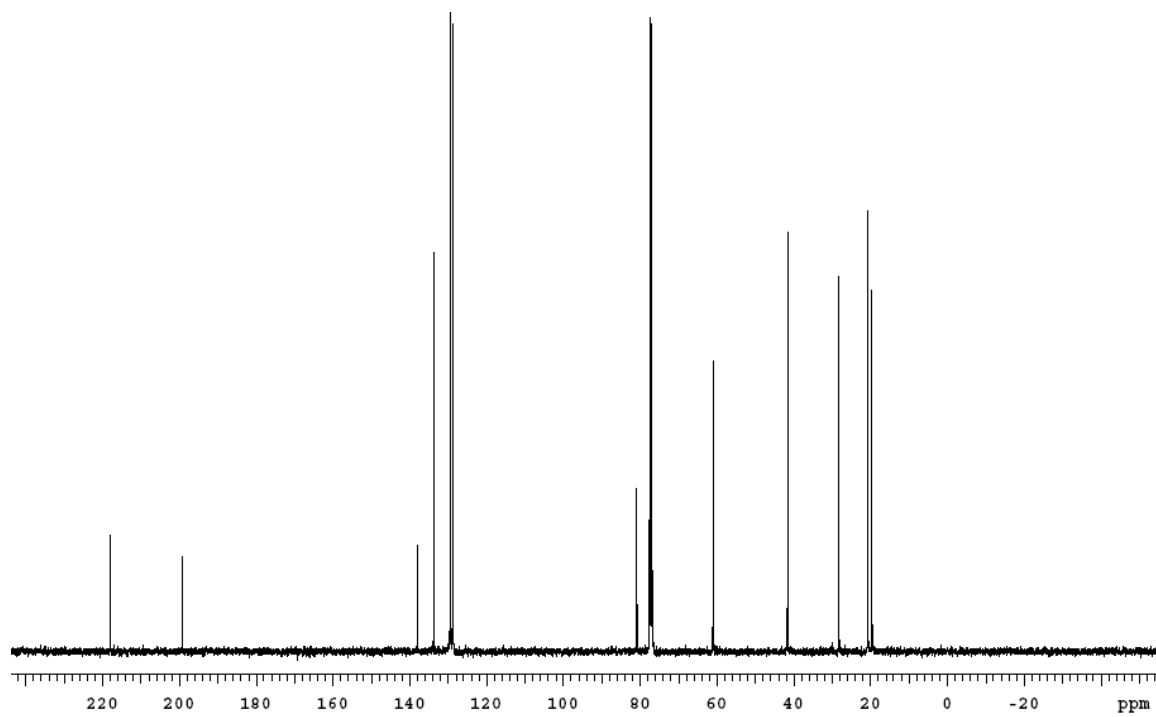

nOe For Compound **10a**, Major Diastereomer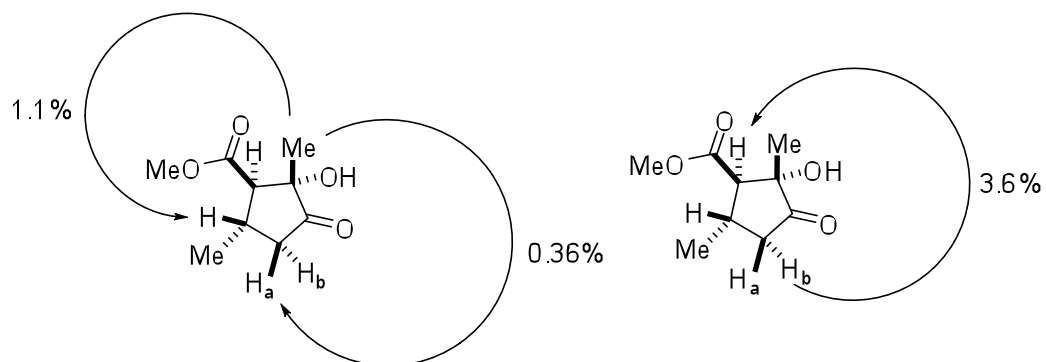nOe For Compound **10f**, Major Diastereomer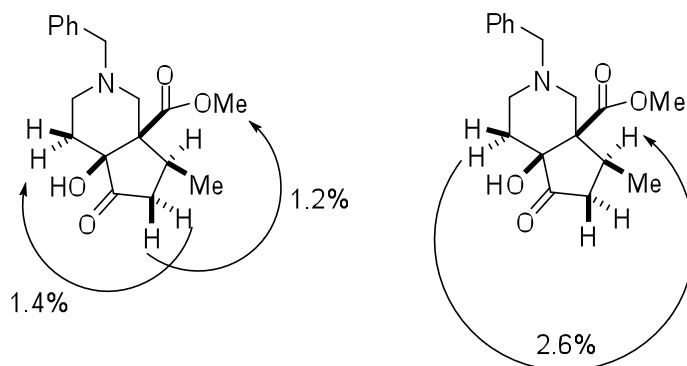

## Determination of Absolute Configuration

Absolute configuration was assigned based on analogy to work done by Jørgensen and co-workers (Carlone, A.; Marigo, M.; North, C.; Landa, A.; Jørgensen, K. A. *Chem. Commun.* **2006**, 4928.)

### Jørgensen

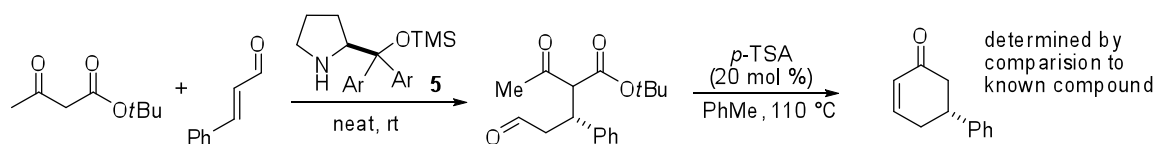

### This Work

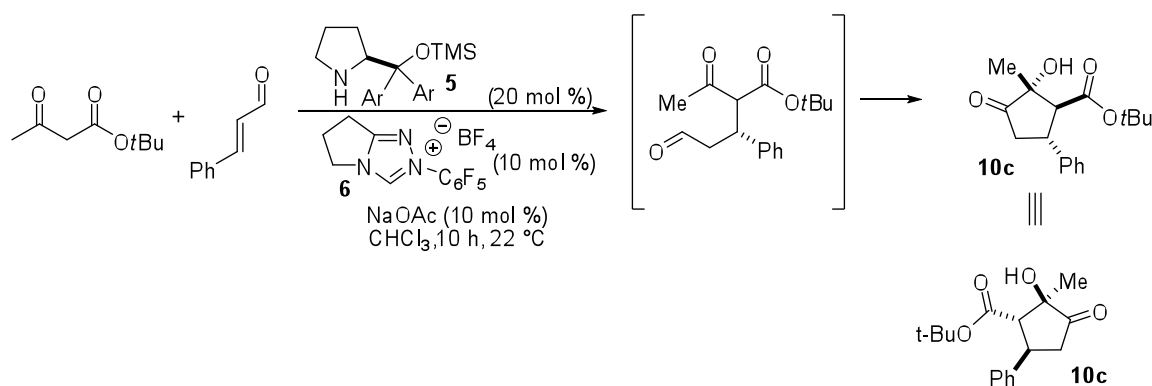

All cyclopentanone products described in this paper are based on this analogy.

## Evidence for a retro-Michael in the absence of azolium

When the one-pot reaction is allowed to stir for 45 min and then the Wittig reagent is added we obtain the enoate **11b** in 82% ee (eq S1) matching closely the ee of **7** (86% ee). However when the intermediate aldehyde is isolated by column chromatography and then subjected to the Wittig

reaction the enoate **11b** is isolated in 60% ee which matches our two step ee of cyclopentanone **7** (eq S2) suggesting that an apparent epimerization reaction occurs upon purification.

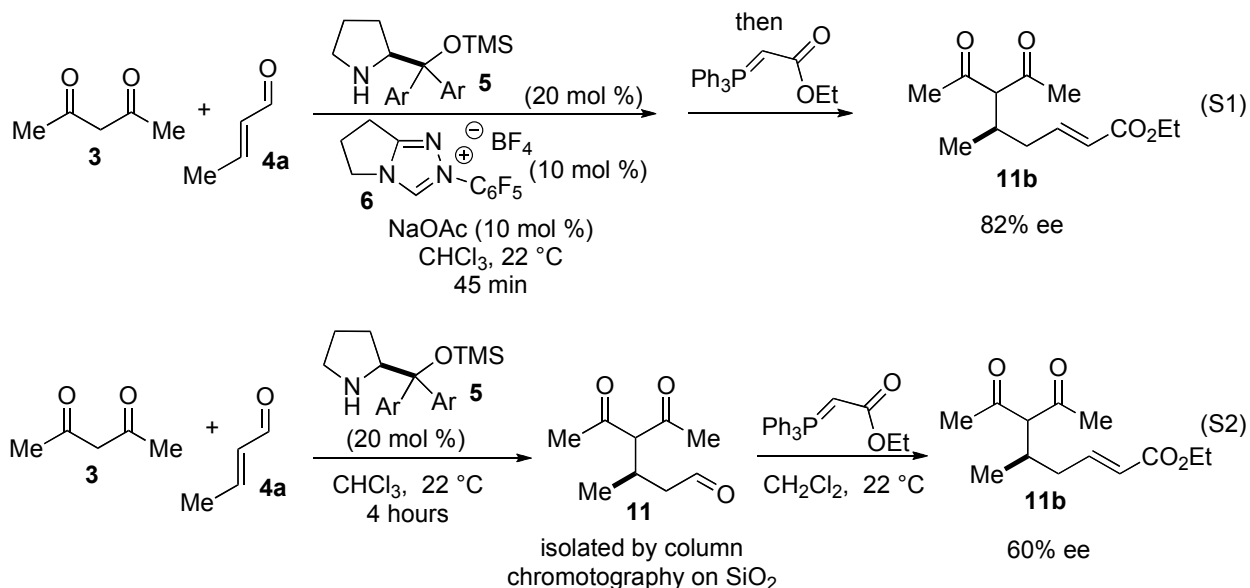

Further support for the epimerization is provided by the following experiments: subsection of aldehyde **11** to prolinol catalyst in the presence of dibenzoylmethane leads to partial generation of the crossover product in a 4:1 ratio (S3). This reaction does not proceed in the absence of prolinol **5** (eq S4) indicating that a retro-Michael is most likely responsible for the degradation of selectivity in the two-step reaction.

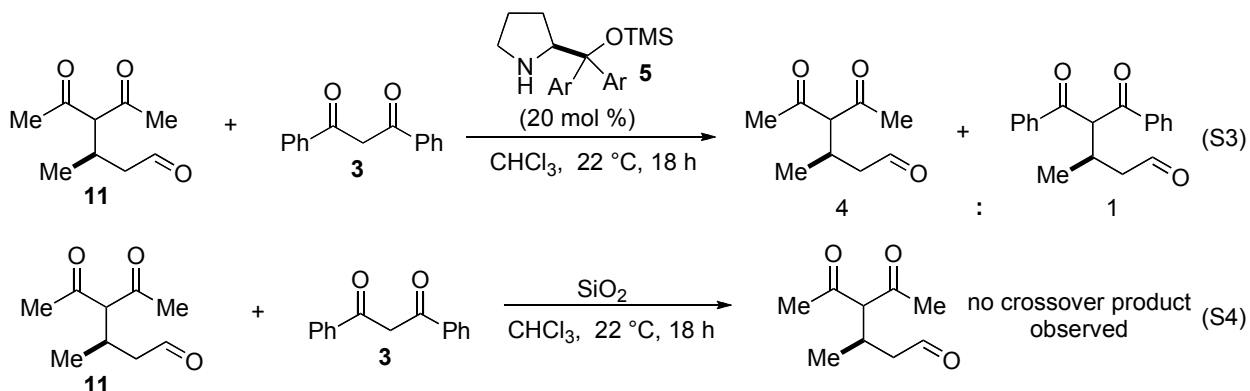

# Crystal Structure for Compound 13

## (Major Diastereomer)

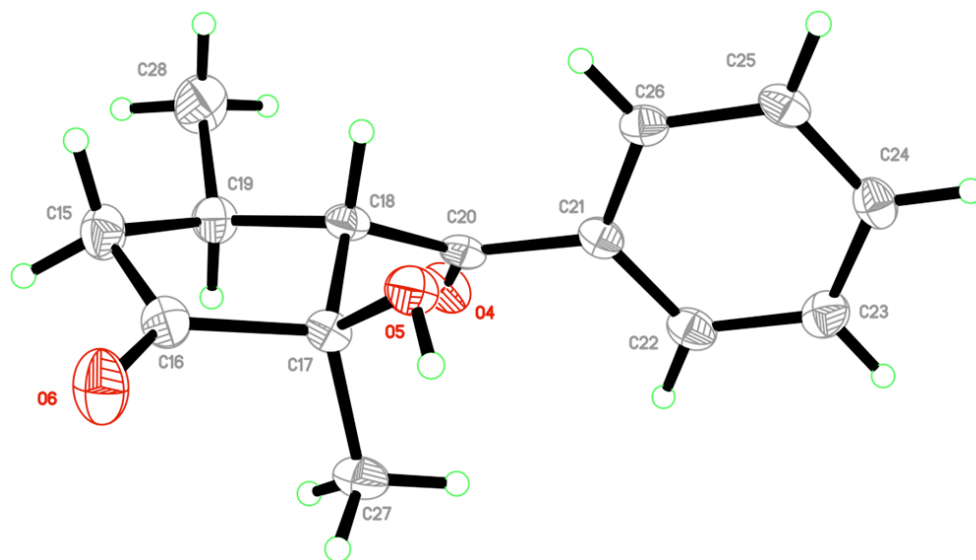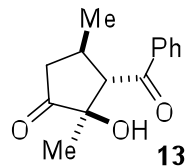Table 1. Crystal data and structure refinement for compound **13** (major diastereomer).

|                      |                                                |
|----------------------|------------------------------------------------|
| Identification code  | <b>13</b>                                      |
| Empirical formula    | C <sub>14</sub> H <sub>16</sub> O <sub>3</sub> |
| Formula weight       | 232.27                                         |
| Temperature          | 120 K                                          |
| Wavelength           | 0.71073 Å                                      |
| Crystal system       | Monoclinic                                     |
| Space group          | P2 <sub>1</sub>                                |
| Unit cell dimensions | $a = 5.7342(5)$ Å $a = 90^\circ$ .             |
|                      | $b = 15.4013(12)$ Å $b = 93.861(3)^\circ$ .    |

$c = 13.9378(10) \text{ \AA}$        $\beta = 90^\circ$ .

Volume 1228.11(17)  $\text{\AA}^3$

Z 4

Density (calculated) 1.256  $\text{Mg/m}^3$

Absorption coefficient 0.087  $\text{mm}^{-1}$

F(000) 496

Crystal size 0.35 x 0.13 x 0.09  $\text{mm}^3$

Theta range for data collection 1.97 to 28.29°.

Index ranges  $-7 \leq h \leq 7$ ,  $-20 \leq k \leq 20$ ,  $-18 \leq l \leq 17$

Reflections collected 21792

Independent reflections 5896 [R(int) = 0.0346]

Completeness to theta = 28.29° 99.7 %

Absorption correction Semi-empirical from equivalents

Max. and min. transmission 0.9924 and 0.9700

Refinement method Full-matrix least-squares on  $F^2$

Data / restraints / parameters 5896 / 1 / 313

Goodness-of-fit on  $F^2$  1.075

Final R indices [ $I > 2\sigma(I)$ ] R1 = 0.0385, wR2 = 0.0867

R indices (all data) R1 = 0.0481, wR2 = 0.0911

Absolute structure parameter 0.2(7)

Largest diff. peak and hole 0.203 and -0.219  $\text{e.\AA}^{-3}$

Table 2. Atomic coordinates ( $\times 10^4$ ) and equivalent isotropic displacement parameters ( $\text{\AA}^2 \times 10^3$ ) for **13**.  $U(\text{eq})$  is defined as one third of the trace of the orthogonalized  $U^{ij}$  tensor.

|       | x       | y       | z        | U(eq) |
|-------|---------|---------|----------|-------|
| C(1)  | 3951(3) | 3915(1) | 1346(1)  | 19(1) |
| C(2)  | 4423(3) | 2985(1) | 1619(1)  | 22(1) |
| C(3)  | 2915(3) | 2812(1) | 2471(1)  | 19(1) |
| C(4)  | 2779(3) | 3710(1) | 2962(1)  | 17(1) |
| C(5)  | 2579(3) | 4367(1) | 2113(1)  | 19(1) |
| C(6)  | 786(3)  | 3771(1) | 3624(1)  | 22(1) |
| C(7)  | 954(3)  | 4369(1) | 4469(1)  | 21(1) |
| C(8)  | 2799(3) | 4957(1) | 4625(1)  | 23(1) |
| C(9)  | 2880(3) | 5505(1) | 5419(1)  | 29(1) |
| C(10) | 1140(3) | 5471(1) | 6061(1)  | 31(1) |
| C(11) | -695(3) | 4888(1) | 5915(1)  | 31(1) |
| C(12) | -792(3) | 4344(1) | 5120(1)  | 26(1) |
| C(13) | 3897(3) | 2109(1) | 3154(1)  | 26(1) |
| C(14) | 97(3)   | 4490(1) | 1677(1)  | 28(1) |
| C(15) | 4225(3) | 3155(1) | 6605(1)  | 26(1) |
| C(16) | 4523(3) | 3672(1) | 7519(1)  | 22(1) |
| C(17) | 3307(3) | 3202(1) | 8333(1)  | 17(1) |
| C(18) | 2662(3) | 2307(1) | 7868(1)  | 18(1) |
| C(19) | 2304(3) | 2487(1) | 6779(1)  | 23(1) |
| C(20) | 629(3)  | 1884(1) | 8308(1)  | 19(1) |
| C(21) | 922(3)  | 1565(1) | 9324(1)  | 18(1) |
| C(22) | -929(3) | 1669(1) | 9918(1)  | 22(1) |
| C(23) | -770(3) | 1325(1) | 10840(1) | 24(1) |
| C(24) | 1193(3) | 853(1)  | 11167(1) | 22(1) |
| C(25) | 3026(3) | 743(1)  | 10577(1) | 21(1) |
| C(26) | 2917(3) | 1110(1) | 9662(1)  | 19(1) |
| C(27) | 1196(3) | 3739(1) | 8576(1)  | 24(1) |
| C(28) | 2385(4) | 1674(1) | 6161(1)  | 36(1) |
| O(1)  | 4510(2) | 4285(1) | 623(1)   | 27(1) |
| O(2)  | 3674(2) | 5167(1) | 2388(1)  | 23(1) |
| O(3)  | -982(2) | 3329(1) | 3460(1)  | 36(1) |

|      |          |         |         |       |
|------|----------|---------|---------|-------|
| O(4) | -1284(2) | 1813(1) | 7861(1) | 26(1) |
| O(5) | 4897(2)  | 3074(1) | 9143(1) | 22(1) |
| O(6) | 5538(2)  | 4355(1) | 7641(1) | 33(1) |

---



Table 3. Bond lengths [Å] and angles [°] for **13**.

---

|             |            |
|-------------|------------|
| C(1)-O(1)   | 1.2185(18) |
| C(1)-C(2)   | 1.502(2)   |
| C(1)-C(5)   | 1.536(2)   |
| C(2)-C(3)   | 1.539(2)   |
| C(3)-C(13)  | 1.524(2)   |
| C(3)-C(4)   | 1.546(2)   |
| C(4)-C(6)   | 1.520(2)   |
| C(4)-C(5)   | 1.555(2)   |
| C(5)-O(2)   | 1.4238(18) |
| C(5)-C(14)  | 1.521(2)   |
| C(6)-O(3)   | 1.2295(18) |
| C(6)-C(7)   | 1.492(2)   |
| C(7)-C(12)  | 1.397(2)   |
| C(7)-C(8)   | 1.399(2)   |
| C(8)-C(9)   | 1.390(2)   |
| C(9)-C(10)  | 1.386(2)   |
| C(10)-C(11) | 1.388(3)   |
| C(11)-C(12) | 1.388(3)   |
| C(15)-C(16) | 1.503(2)   |
| C(15)-C(19) | 1.538(2)   |
| C(16)-O(6)  | 1.209(2)   |
| C(16)-C(17) | 1.551(2)   |
| C(17)-O(5)  | 1.4164(18) |
| C(17)-C(27) | 1.523(2)   |
| C(17)-C(18) | 1.557(2)   |
| C(18)-C(20) | 1.502(2)   |
| C(18)-C(19) | 1.543(2)   |
| C(19)-C(28) | 1.522(3)   |
| C(20)-O(4)  | 1.2290(18) |
| C(20)-C(21) | 1.498(2)   |
| C(21)-C(26) | 1.396(2)   |
| C(21)-C(22) | 1.399(2)   |
| C(22)-C(23) | 1.387(2)   |
| C(23)-C(24) | 1.391(2)   |

|                   |            |
|-------------------|------------|
| C(24)-C(25)       | 1.388(2)   |
| C(25)-C(26)       | 1.392(2)   |
| O(1)-C(1)-C(2)    | 127.00(14) |
| O(1)-C(1)-C(5)    | 122.66(14) |
| C(2)-C(1)-C(5)    | 110.34(12) |
| C(1)-C(2)-C(3)    | 105.05(13) |
| C(13)-C(3)-C(2)   | 113.72(13) |
| C(13)-C(3)-C(4)   | 112.72(12) |
| C(2)-C(3)-C(4)    | 103.55(12) |
| C(6)-C(4)-C(3)    | 112.76(13) |
| C(6)-C(4)-C(5)    | 113.69(13) |
| C(3)-C(4)-C(5)    | 104.42(12) |
| O(2)-C(5)-C(14)   | 112.56(12) |
| O(2)-C(5)-C(1)    | 110.03(12) |
| C(14)-C(5)-C(1)   | 106.68(12) |
| O(2)-C(5)-C(4)    | 110.50(12) |
| C(14)-C(5)-C(4)   | 113.82(13) |
| C(1)-C(5)-C(4)    | 102.67(12) |
| O(3)-C(6)-C(7)    | 119.81(14) |
| O(3)-C(6)-C(4)    | 119.76(14) |
| C(7)-C(6)-C(4)    | 120.43(13) |
| C(12)-C(7)-C(8)   | 119.01(15) |
| C(12)-C(7)-C(6)   | 118.98(14) |
| C(8)-C(7)-C(6)    | 122.01(14) |
| C(9)-C(8)-C(7)    | 120.09(15) |
| C(10)-C(9)-C(8)   | 120.30(17) |
| C(9)-C(10)-C(11)  | 120.14(16) |
| C(10)-C(11)-C(12) | 119.80(15) |
| C(11)-C(12)-C(7)  | 120.67(16) |
| C(16)-C(15)-C(19) | 105.18(13) |
| O(6)-C(16)-C(15)  | 127.35(15) |
| O(6)-C(16)-C(17)  | 122.67(14) |
| C(15)-C(16)-C(17) | 109.99(13) |
| O(5)-C(17)-C(27)  | 112.13(12) |
| O(5)-C(17)-C(16)  | 110.55(12) |

|                   |            |
|-------------------|------------|
| C(27)-C(17)-C(16) | 108.19(12) |
| O(5)-C(17)-C(18)  | 109.36(12) |
| C(27)-C(17)-C(18) | 113.78(12) |
| C(16)-C(17)-C(18) | 102.40(12) |
| C(20)-C(18)-C(19) | 115.12(13) |
| C(20)-C(18)-C(17) | 112.50(12) |
| C(19)-C(18)-C(17) | 105.21(12) |
| C(28)-C(19)-C(15) | 114.26(14) |
| C(28)-C(19)-C(18) | 113.66(14) |
| C(15)-C(19)-C(18) | 103.11(12) |
| O(4)-C(20)-C(21)  | 119.31(14) |
| O(4)-C(20)-C(18)  | 121.48(14) |
| C(21)-C(20)-C(18) | 119.18(13) |
| C(26)-C(21)-C(22) | 119.71(14) |
| C(26)-C(21)-C(20) | 121.41(13) |
| C(22)-C(21)-C(20) | 118.69(13) |
| C(23)-C(22)-C(21) | 119.96(14) |
| C(22)-C(23)-C(24) | 120.27(15) |
| C(25)-C(24)-C(23) | 119.87(14) |
| C(24)-C(25)-C(26) | 120.30(14) |
| C(25)-C(26)-C(21) | 119.84(14) |

---

Symmetry transformations used to generate equivalent atoms:

Table 4. Anisotropic displacement parameters ( $\text{\AA}^2 \times 10^3$ ) for **13**. The anisotropic displacement factor exponent takes the form:  $-2p^2[ h^2 a^* U^{11} + \dots + 2 h k a^* b^* U^{12} ]$

|       | U <sup>11</sup> | U <sup>22</sup> | U <sup>33</sup> | U <sup>23</sup> | U <sup>13</sup> | U <sup>12</sup> |
|-------|-----------------|-----------------|-----------------|-----------------|-----------------|-----------------|
| C(1)  | 19(1)           | 18(1)           | 18(1)           | -2(1)           | -4(1)           | -3(1)           |
| C(2)  | 26(1)           | 18(1)           | 22(1)           | -2(1)           | 3(1)            | 1(1)            |
| C(3)  | 20(1)           | 16(1)           | 21(1)           | 0(1)            | -1(1)           | -2(1)           |
| C(4)  | 16(1)           | 18(1)           | 17(1)           | -1(1)           | 0(1)            | -1(1)           |
| C(5)  | 20(1)           | 15(1)           | 21(1)           | 1(1)            | -1(1)           | -1(1)           |
| C(6)  | 20(1)           | 23(1)           | 24(1)           | 1(1)            | 2(1)            | -3(1)           |
| C(7)  | 20(1)           | 23(1)           | 20(1)           | 2(1)            | 1(1)            | 3(1)            |
| C(8)  | 23(1)           | 26(1)           | 21(1)           | 0(1)            | 4(1)            | -3(1)           |
| C(9)  | 31(1)           | 30(1)           | 27(1)           | -4(1)           | 3(1)            | -5(1)           |
| C(10) | 35(1)           | 35(1)           | 24(1)           | -7(1)           | 4(1)            | 2(1)            |
| C(11) | 28(1)           | 41(1)           | 26(1)           | 2(1)            | 10(1)           | 5(1)            |
| C(12) | 19(1)           | 32(1)           | 26(1)           | 2(1)            | 4(1)            | -1(1)           |
| C(13) | 29(1)           | 20(1)           | 29(1)           | 5(1)            | -3(1)           | -4(1)           |
| C(14) | 21(1)           | 23(1)           | 38(1)           | 4(1)            | -5(1)           | 1(1)            |
| C(15) | 27(1)           | 30(1)           | 20(1)           | 4(1)            | 1(1)            | 0(1)            |
| C(16) | 16(1)           | 25(1)           | 24(1)           | 3(1)            | -1(1)           | -1(1)           |
| C(17) | 17(1)           | 16(1)           | 19(1)           | 0(1)            | -2(1)           | 0(1)            |
| C(18) | 19(1)           | 17(1)           | 19(1)           | -1(1)           | -2(1)           | 5(1)            |
| C(19) | 23(1)           | 25(1)           | 19(1)           | 0(1)            | -2(1)           | 1(1)            |
| C(20) | 21(1)           | 12(1)           | 23(1)           | -3(1)           | -1(1)           | 2(1)            |
| C(21) | 18(1)           | 14(1)           | 23(1)           | -1(1)           | -1(1)           | -3(1)           |
| C(22) | 18(1)           | 18(1)           | 30(1)           | 2(1)            | -1(1)           | 0(1)            |
| C(23) | 22(1)           | 23(1)           | 28(1)           | -1(1)           | 7(1)            | -3(1)           |
| C(24) | 26(1)           | 16(1)           | 22(1)           | 2(1)            | -2(1)           | -6(1)           |
| C(25) | 21(1)           | 15(1)           | 26(1)           | -1(1)           | -4(1)           | 1(1)            |
| C(26) | 18(1)           | 15(1)           | 24(1)           | -3(1)           | 1(1)            | -1(1)           |
| C(27) | 20(1)           | 19(1)           | 34(1)           | -1(1)           | 1(1)            | 3(1)            |
| C(28) | 50(1)           | 36(1)           | 24(1)           | -7(1)           | 1(1)            | -2(1)           |
| O(1)  | 40(1)           | 21(1)           | 20(1)           | 1(1)            | 4(1)            | -6(1)           |
| O(2)  | 26(1)           | 13(1)           | 29(1)           | -1(1)           | -1(1)           | -1(1)           |
| O(3)  | 26(1)           | 44(1)           | 38(1)           | -11(1)          | 9(1)            | -18(1)          |

|      |       |       |       |       |       |        |
|------|-------|-------|-------|-------|-------|--------|
| O(4) | 21(1) | 25(1) | 30(1) | 3(1)  | -8(1) | -3(1)  |
| O(5) | 25(1) | 22(1) | 18(1) | -2(1) | -4(1) | 3(1)   |
| O(6) | 34(1) | 35(1) | 31(1) | 1(1)  | 2(1)  | -15(1) |

---

Table 5. Hydrogen coordinates ( $\times 10^4$ ) and isotropic displacement parameters ( $\text{\AA}^2 \times 10^3$ ) for **13**.

|        | x     | y    | z     | U(eq) |
|--------|-------|------|-------|-------|
| H(2A)  | 6066  | 2899 | 1807  | 26    |
| H(2B)  | 3981  | 2601 | 1086  | 26    |
| H(3)   | 1343  | 2642 | 2221  | 23    |
| H(4)   | 4254  | 3815 | 3341  | 21    |
| H(8)   | 3973  | 4982 | 4197  | 27    |
| H(9)   | 4108  | 5896 | 5519  | 35    |
| H(10)  | 1202  | 5840 | 6590  | 38    |
| H(11)  | -1855 | 4862 | 6350  | 38    |
| H(12)  | -2033 | 3958 | 5020  | 31    |
| H(13A) | 4006  | 1572 | 2810  | 39    |
| H(13B) | 2880  | 2035 | 3668  | 39    |
| H(13C) | 5422  | 2278 | 3415  | 39    |
| H(14A) | -807  | 4796 | 2123  | 42    |
| H(14B) | -598  | 3933 | 1540  | 42    |
| H(14C) | 130   | 4819 | 1093  | 42    |
| H(15A) | 5672  | 2865 | 6474  | 31    |
| H(15B) | 3755  | 3528 | 6065  | 31    |
| H(18)  | 4018  | 1923 | 7973  | 22    |
| H(19)  | 779   | 2766 | 6650  | 27    |
| H(22)  | -2266 | 1968 | 9695  | 26    |
| H(23)  | -1981 | 1411 | 11241 | 29    |
| H(24)  | 1278  | 611  | 11779 | 26    |
| H(25)  | 4332  | 423  | 10793 | 25    |
| H(26)  | 4171  | 1052 | 9277  | 23    |
| H(27A) | 409   | 3455 | 9076  | 36    |
| H(27B) | 144   | 3796 | 8014  | 36    |
| H(27C) | 1704  | 4304 | 8792  | 36    |
| H(28A) | 2182  | 1832 | 5495  | 55    |
| H(28B) | 1155  | 1286 | 6317  | 55    |
| H(28C) | 3867  | 1392 | 6283  | 55    |

|      |      |      |      |    |
|------|------|------|------|----|
| H(2) | 2862 | 5573 | 2180 | 34 |
| H(5) | 4834 | 3490 | 9508 | 33 |

---

## X-Ray Crystal Structure for Compound **10d** (Minor Diastereomer)

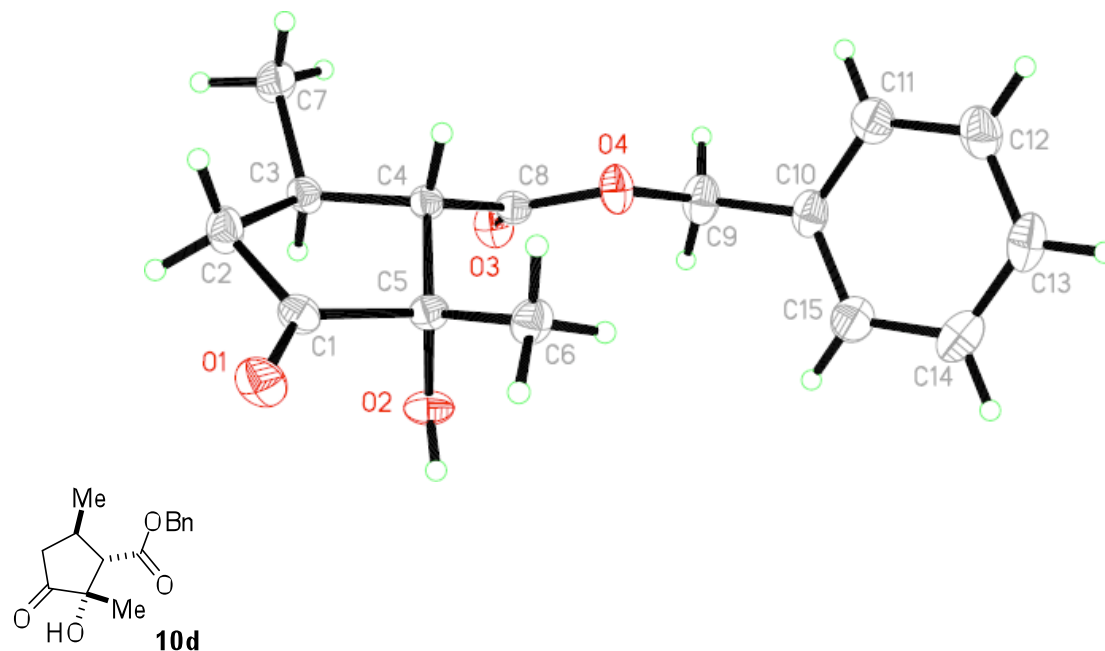Table 6. Crystal data and structure refinement for **10d** (minor diastereomer).

|                        |                                                |                              |
|------------------------|------------------------------------------------|------------------------------|
| Identification code    | <b>10d</b>                                     |                              |
| Empirical formula      | C <sub>15</sub> H <sub>18</sub> O <sub>4</sub> |                              |
| Formula weight         | 262.29                                         |                              |
| Temperature            | 120 K                                          |                              |
| Wavelength             | 0.71073 Å                                      |                              |
| Crystal system         | Monoclinic                                     |                              |
| Space group            | P2 <sub>1</sub>                                |                              |
| Unit cell dimensions   | $a = 11.8387(6)$ Å                             | $\alpha = 90^\circ$ .        |
|                        | $b = 4.9870(3)$ Å                              | $\beta = 107.049(3)^\circ$ . |
|                        | $c = 12.2899(6)$ Å                             | $\gamma = 90^\circ$ .        |
| Volume                 | $693.70(6)$ Å <sup>3</sup>                     |                              |
| Z                      | 2                                              |                              |
| Density (calculated)   | 1.256 Mg/m <sup>3</sup>                        |                              |
| Absorption coefficient | 0.090 mm <sup>-1</sup>                         |                              |
| F(000)                 | 280                                            |                              |
| Crystal size           | 0.33 x 0.32 x 0.28 mm <sup>3</sup>             |                              |



|                                   |                                             |
|-----------------------------------|---------------------------------------------|
| Theta range for data collection   | 1.73 to 32.59°.                             |
| Index ranges                      | -17<=h<=17, -7<=k<=7, -17<=l<=18            |
| Reflections collected             | 17342                                       |
| Independent reflections           | 4947 [R(int) = 0.0342]                      |
| Completeness to theta = 32.59°    | 99.9 %                                      |
| Absorption correction             | Semi-empirical from equivalents             |
| Max. and min. transmission        | 0.9753 and 0.9710                           |
| Refinement method                 | Full-matrix least-squares on F <sup>2</sup> |
| Data / restraints / parameters    | 4947 / 1 / 175                              |
| Goodness-of-fit on F <sup>2</sup> | 1.035                                       |
| Final R indices [I>2sigma(I)]     | R1 = 0.0434, wR2 = 0.1091                   |
| R indices (all data)              | R1 = 0.0526, wR2 = 0.1158                   |
| Absolute structure parameter      | -0.3(7)                                     |
| Largest diff. peak and hole       | 0.363 and -0.281 e.Å <sup>-3</sup>          |

Table 7. Atomic coordinates ( $\times 10^4$ ) and equivalent isotropic displacement parameters ( $\text{\AA}^2 \times 10^3$ ) for **10d**.  $U(\text{eq})$  is defined as one third of the trace of the orthogonalized  $U^{ij}$  tensor.

|       | x        | y       | z       | U(eq) |
|-------|----------|---------|---------|-------|
| C(1)  | 6745(1)  | 9272(2) | 239(1)  | 21(1) |
| C(2)  | 7958(1)  | 9599(3) | 99(1)   | 25(1) |
| C(3)  | 8812(1)  | 8255(2) | 1141(1) | 20(1) |
| C(4)  | 8168(1)  | 8575(2) | 2054(1) | 17(1) |
| C(5)  | 6853(1)  | 8108(2) | 1427(1) | 18(1) |
| C(6)  | 5981(1)  | 9235(3) | 1995(1) | 24(1) |
| C(7)  | 10047(1) | 9467(3) | 1470(1) | 26(1) |
| C(8)  | 8618(1)  | 6737(2) | 3067(1) | 19(1) |
| C(9)  | 8510(1)  | 5804(3) | 4935(1) | 29(1) |
| C(10) | 7658(1)  | 6491(3) | 5590(1) | 25(1) |
| C(11) | 7885(1)  | 8629(3) | 6352(1) | 30(1) |
| C(12) | 7089(1)  | 9287(3) | 6939(1) | 32(1) |
| C(13) | 6067(1)  | 7795(3) | 6785(1) | 34(1) |
| C(14) | 5832(1)  | 5674(3) | 6027(1) | 38(1) |
| C(15) | 6623(1)  | 5037(3) | 5428(1) | 32(1) |
| O(1)  | 5814(1)  | 9740(2) | -476(1) | 28(1) |
| O(2)  | 6701(1)  | 5267(2) | 1229(1) | 24(1) |
| O(3)  | 9249(1)  | 4817(2) | 3111(1) | 27(1) |
| O(4)  | 8208(1)  | 7518(2) | 3925(1) | 25(1) |

Table 8. Bond lengths [Å] and angles [°] for **10d**.

|                |            |                   |            |
|----------------|------------|-------------------|------------|
| C(1)-O(1)      | 1.2141(13) | O(2)-C(5)-C(1)    | 103.77(9)  |
| C(1)-C(2)      | 1.5051(16) | C(6)-C(5)-C(1)    | 114.71(9)  |
| C(1)-C(5)      | 1.5416(16) | C(4)-C(5)-C(1)    | 102.01(9)  |
| C(2)-C(3)      | 1.5338(16) | O(3)-C(8)-O(4)    | 123.86(11) |
| C(3)-C(7)      | 1.5228(16) | O(3)-C(8)-C(4)    | 125.65(11) |
| C(3)-C(4)      | 1.5389(15) | O(4)-C(8)-C(4)    | 110.49(9)  |
| C(4)-C(8)      | 1.5110(15) | O(4)-C(9)-C(10)   | 106.64(9)  |
| C(4)-C(5)      | 1.5390(15) | C(15)-C(10)-C(11) | 119.00(12) |
| C(5)-O(2)      | 1.4399(14) | C(15)-C(10)-C(9)  | 120.50(12) |
| C(5)-C(6)      | 1.5134(16) | C(11)-C(10)-C(9)  | 120.49(12) |
| C(8)-O(3)      | 1.2057(14) | C(12)-C(11)-C(10) | 120.36(13) |
| C(8)-O(4)      | 1.3415(14) | C(11)-C(12)-C(13) | 120.18(14) |
| C(9)-O(4)      | 1.4622(15) | C(14)-C(13)-C(12) | 119.86(13) |
| C(9)-C(10)     | 1.5025(18) | C(13)-C(14)-C(15) | 119.95(14) |
| C(10)-C(15)    | 1.3870(18) | C(14)-C(15)-C(10) | 120.64(14) |
| C(10)-C(11)    | 1.3927(19) | C(8)-O(4)-C(9)    | 116.31(9)  |
| C(11)-C(12)    | 1.384(2)   |                   |            |
| C(12)-C(13)    | 1.385(2)   |                   |            |
| C(13)-C(14)    | 1.383(2)   |                   |            |
| C(14)-C(15)    | 1.387(2)   |                   |            |
| O(1)-C(1)-C(2) | 126.21(11) |                   |            |
| O(1)-C(1)-C(5) | 124.33(10) |                   |            |
| C(2)-C(1)-C(5) | 109.41(9)  |                   |            |
| C(1)-C(2)-C(3) | 105.94(9)  |                   |            |
| C(7)-C(3)-C(2) | 113.23(10) |                   |            |
| C(7)-C(3)-C(4) | 114.07(9)  |                   |            |
| C(2)-C(3)-C(4) | 102.56(9)  |                   |            |
| C(8)-C(4)-C(3) | 114.03(9)  |                   |            |
| C(8)-C(4)-C(5) | 112.40(9)  |                   |            |
| C(3)-C(4)-C(5) | 105.32(9)  |                   |            |
| O(2)-C(5)-C(6) | 112.05(9)  |                   |            |
| O(2)-C(5)-C(4) | 106.95(9)  |                   |            |
| C(6)-C(5)-C(4) | 116.11(9)  |                   |            |

---

Symmetry transformations used to generate equivalent atoms:

Table 9. Anisotropic displacement parameters ( $\text{\AA}^2 \times 10^3$ ) for **10d**. The anisotropic displacement factor exponent takes the form:  $-2\pi^2 [ h^2 a^{*2} U^{11} + \dots + 2 h k a^* b^* U^{12} ]$

|       | U <sup>11</sup> | U <sup>22</sup> | U <sup>33</sup> | U <sup>23</sup> | U <sup>13</sup> | U <sup>12</sup> |
|-------|-----------------|-----------------|-----------------|-----------------|-----------------|-----------------|
| C(1)  | 18(1)           | 22(1)           | 19(1)           | -1(1)           | 1(1)            | 2(1)            |
| C(2)  | 20(1)           | 36(1)           | 19(1)           | 4(1)            | 5(1)            | 2(1)            |
| C(3)  | 15(1)           | 26(1)           | 17(1)           | -2(1)           | 4(1)            | 1(1)            |
| C(4)  | 15(1)           | 21(1)           | 16(1)           | -1(1)           | 4(1)            | -1(1)           |
| C(5)  | 14(1)           | 20(1)           | 19(1)           | 1(1)            | 3(1)            | 1(1)            |
| C(6)  | 18(1)           | 28(1)           | 27(1)           | 1(1)            | 9(1)            | 3(1)            |
| C(7)  | 16(1)           | 38(1)           | 25(1)           | 1(1)            | 6(1)            | -2(1)           |
| C(8)  | 14(1)           | 24(1)           | 18(1)           | -1(1)           | 2(1)            | -2(1)           |
| C(9)  | 26(1)           | 38(1)           | 22(1)           | 10(1)           | 7(1)            | 8(1)            |
| C(10) | 22(1)           | 35(1)           | 17(1)           | 8(1)            | 4(1)            | 5(1)            |
| C(11) | 23(1)           | 42(1)           | 21(1)           | 3(1)            | 1(1)            | -1(1)           |
| C(12) | 33(1)           | 42(1)           | 20(1)           | 3(1)            | 5(1)            | 4(1)            |
| C(13) | 34(1)           | 45(1)           | 29(1)           | 9(1)            | 17(1)           | 6(1)            |
| C(14) | 31(1)           | 42(1)           | 45(1)           | 5(1)            | 19(1)           | -4(1)           |
| C(15) | 31(1)           | 34(1)           | 31(1)           | 1(1)            | 11(1)           | -2(1)           |
| O(1)  | 19(1)           | 35(1)           | 24(1)           | 2(1)            | -2(1)           | 5(1)            |
| O(2)  | 16(1)           | 20(1)           | 30(1)           | -1(1)           | 0(1)            | -1(1)           |
| O(3)  | 23(1)           | 32(1)           | 24(1)           | 4(1)            | 5(1)            | 7(1)            |
| O(4)  | 28(1)           | 31(1)           | 18(1)           | 5(1)            | 8(1)            | 7(1)            |

Table 10. Hydrogen coordinates ( $\times 10^4$ ) and isotropic displacement parameters ( $\text{\AA}^2 \times 10^3$ ) for **10d**.

|       | x     | y     | z    | U(eq) |
|-------|-------|-------|------|-------|
| H(2A) | 8150  | 11483 | 69   | 30    |
| H(2B) | 8001  | 8740  | -596 | 30    |
| H(3)  | 8868  | 6342  | 981  | 24    |
| H(4)  | 8265  | 10432 | 2327 | 21    |
| H(6A) | 6022  | 8221  | 2669 | 35    |
| H(6B) | 5196  | 9123  | 1479 | 35    |
| H(6C) | 6171  | 11076 | 2195 | 35    |
| H(7A) | 10543 | 8533  | 2117 | 40    |
| H(7B) | 10004 | 11327 | 1656 | 40    |
| H(7C) | 10372 | 9306  | 843  | 40    |
| H(9A) | 9315  | 6136  | 5395 | 34    |
| H(9B) | 8436  | 3929  | 4716 | 34    |
| H(11) | 8576  | 9619  | 6468 | 35    |
| H(12) | 7240  | 10735 | 7437 | 38    |
| H(13) | 5540  | 8218  | 7191 | 41    |
| H(14) | 5145  | 4675  | 5919 | 45    |
| H(15) | 6457  | 3622  | 4913 | 38    |
| H(2)  | 5997  | 4932  | 948  | 35    |
